# Supplementary material for: Self-immolative polydisulfides and their use as nanoparticles for drug delivery systems
Source: Royal Society of Chemistry journal article supplement (doi:10.1039/d4ra07228f), 2024-01-01
Supplement: d4ra07228f1.pdf [file d4ra07228f1.pdf]

# Supporting Information

## Self-immolative Polydisulfides and their Use as Nanoparticles for Drug Delivery Systems

Katharina Völlmecke,<sup>a</sup> Maurice Kramer,<sup>b</sup> Corinna Horky,<sup>b</sup> Oliver Dückmann,<sup>a</sup> Dennis Mulac<sup>b</sup>, Klaus Langer<sup>b</sup> and Dirk Kuckling <sup>\*a</sup>

<sup>a</sup> Paderborn University, Warburger Straße 100, 33098 Paderborn, Germany

<sup>b</sup> Institute of Pharmaceutical Technology and Biopharmacy, University of Münster, Corrensstr. 48, D-48149 Münster, Germany

### Contents

|                                                                 |    |
|-----------------------------------------------------------------|----|
| Materials & Methods .....                                       | 2  |
| Materials .....                                                 | 2  |
| Synthesis of Homo- and Copolymers .....                         | 2  |
| Synthesis of pDTT <sub>21</sub> .....                           | 2  |
| Synthesis of pDTT <sub>36</sub> .....                           | 2  |
| Synthesis of pDTT <sub>69</sub> .....                           | 3  |
| Synthesis of p(DTT <sub>14</sub> -co-pBDT <sub>9</sub> ) .....  | 3  |
| Synthesis of p(DTT <sub>16</sub> -co-pBDT <sub>7</sub> ) .....  | 3  |
| Synthesis of p(DTT <sub>22</sub> -co-pBDT <sub>3</sub> ) .....  | 3  |
| <sup>1</sup> H-NMR Degradation Study.....                       | 4  |
| Polymer Analysis .....                                          | 6  |
| GPC Analysis .....                                              | 6  |
| NMR Analysis.....                                               | 7  |
| DSC Analysis .....                                              | 11 |
| Polymer Degradation .....                                       | 11 |
| GPC results of pDTT <sub>36</sub> .....                         | 11 |
| GPC results of pDTT <sub>69</sub> .....                         | 12 |
| GPC results of pDTT <sub>21</sub> .....                         | 13 |
| NMR results of Homopolymer Degradation.....                     | 14 |
| Copolymer Degradation .....                                     | 17 |
| GPC Results of p(DTT <sub>14</sub> -co-BDT <sub>9</sub> ) ..... | 17 |
| GPC Results of p(DTT <sub>16</sub> -co-BDT <sub>7</sub> ) ..... | 18 |
| GPC Results of p(DTT <sub>22</sub> -co-BDT <sub>3</sub> ) ..... | 19 |
| <sup>1</sup> H-NMR results of Copolymer Degradation .....       | 20 |
| Particle Degradation.....                                       | 23 |
| Blank Particles .....                                           | 23 |
| Nile Red particles.....                                         | 23 |
| SEM image analysis of blank particles .....                     | 24 |

## Materials & Methods

### Materials

All materials were used without further purification. *N,N*-imethylacetamide (99.5%), *N,N*-dimethylformamide (anhydrous, amine free, 99.9%), dithiothreitol (electrophoresis, 99%), and lithium bromide (anhydrous, 99+%) were purchased from Thermo Fisher. Dimethylsulfoxide- $d_6$  (99.8%) was obtained from Deutero GmbH. 2,2'-Dipyridyl disulfide (98%) was purchased from abcr. Glutathione (97%) was purchased from Alfa Aesar. 2,6-Di-*tert*-butyl-4-methylphenol (99%) was purchased from Fluka. Tetrahydrofuran (p.A.) was purchased from Stockmeier.

### Synthesis of Homo- and Copolymers

#### Synthesis of pDTT<sub>21</sub>

A schlenk flask was flushed with DPDS (2269 mg, 10.3 mmol, 1.03 eq.) and evacuated. The flask was then flushed with N<sub>2</sub> and DTT (1543 mg, 10.0 mmol, 1 eq.) was added. DMF was added to dissolve the solids (1.8 mL). After 1 h DMF (1.5 mL) was added to dilute the solution. The polymer was precipitated into four 30 mL centrifuge tubes with 1:1 chloroform/isohehexane and centrifuged for 15 min. The precipitate was solved in DMF. The precipitation was repeated four times to give a light yellow solid that was dried in vacuo overnight. Yield: 859 mg; 53 %

$M_{n,NMR} \approx 3420 \text{ g mol}^{-1}$ ,  $M_{n,GPC} \approx 4800 \text{ g mol}^{-1}$

<sup>1</sup>H NMR (500 MHz, DMSO- $d_6$ )  $\delta$  ppm 2.78 (m, 43 H, CH<sub>2</sub>), 2.92 (m, 43 H, CH<sub>2</sub>), 3.72 (m, 46 H, CH), 4.91 (m, 43 H, OH), 7.24 (m, 2 H, CH), 7.82 (m, 4 H, CH), 8.46 (m, 2 H, CH)

<sup>13</sup>C NMR (176 MHz, DMSO- $d_6$ )  $\delta$  ppm 41.9 (s, 1 C, CH<sub>2</sub>), 42.0 (s, 1 C, CH<sub>2</sub>), 70.5 (s, 1 C, CH), 70.6 (s, 1 C, CH), 119.3 (s, 1 C, CH), 121.1 (s, 1 C, CH), 137.8 (s, 1 C, CH), 149.5 (s, 1 C, CH), 159.4 (s, 1 C, CH)

#### Synthesis of pDTT<sub>36</sub>

DTT (1853 mg, 12.01 mmol, 1 eq.) was placed in a N<sub>2</sub> flushed Schlenk flask, evacuated and flushed with N<sub>2</sub> again. DPDS (2673 mg, 12.13 mmol, 1.01 eq.) was added and the flask was evacuated and flushed with N<sub>2</sub> again. The solids were stirred and the powder turned from white to yellow. Anhydrous DMF (2.7 mL) was added and stirred at r.t. After 17 h the solution was turbid, DMF (1.5 mL) was added to resolve the precipitate. After 2 min the yellow solution was precipitated into four 30 mL centrifuge tubes with 1:1 chloroform/isohehexane mixture and centrifuged for 15 min. The supernatant was removed and a sample of the solid was taken for NMR analysis. The precipitate was dissolved in DMF. The precipitation was repeated three times to give a light yellow solid that was dried in vacuo overnight. Yield: 1058.8 mg, 56%;

$M_{n,NMR} \approx 5700 \text{ g mol}^{-1}$ ,  $M_{n,GPC} \approx 5600 \text{ g mol}^{-1}$

<sup>1</sup>H NMR (500 MHz, DMSO- $d_6$ )  $\delta$  ppm 2.79 (m, 72 H, CH<sub>2</sub>), 2.92 (m, 71 H, CH<sub>2</sub>), 3.72 (br s, 74 H, CH), 4.91 (m, 73 H, OH), 7.24 (m, 2 H, CH), 7.83 (s, 4 H, CH), 8.46 (m, 2 H, CH)

<sup>13</sup>C NMR (176 MHz, DMSO- $d_6$ )  $\delta$  ppm 41.9 (s, 1 C, CH<sub>2</sub>), 42.0 (s, 1 C, CH<sub>2</sub>), 70.5 (s, 1 C, CH), 70.6 (s, 1 C, CH), 119.3 (s, 1 C, CH), 121.1 (s, 1 C, CH), 137.8 (s, 1 C, CH), 149.5 (s, 1 C, CH), 159.4 (s, 1 C, CH)

### Synthesis of pDTT<sub>69</sub>

DPDS (2673 mg, 12.13 mmol, 1.01 eq.) was placed in a N<sub>2</sub> flushed Schlenk flask, evacuated and flushed with N<sub>2</sub>. DTT (1854 mg, 12.02 mmol, 1 eq.) was added and the flask was evacuated and flushed with N<sub>2</sub> again. The solids were stirred and the powder turned from white to yellow. The mixture was cooled in an ice bath. Anhydrous DMF (2.7 mL) was added and stirred at 0 °C. After one hour the solution became turbid. After 24 h the suspension was diluted with DMF (0.5 mL) and precipitated into four 30 mL centrifuge tubes with 1:1 chloroform/isohehexane mixture and centrifuged for 15 min. The precipitate was dissolved in DMF and precipitated again. The precipitation was repeated four times to give a light yellow solid that was dried in vacuo overnight. Yield: 1075.5 mg, 58%;  $M_{n,NMR} \approx 10730 \text{ g mol}^{-1}$ ,  $M_{n,GPC} \approx 7300 \text{ g mol}^{-1}$

<sup>1</sup>H NMR (500 MHz, DMSO-*d*<sub>6</sub>)  $\delta$  ppm 2.78 (m, 138 H, CH<sub>2</sub>), 2.92 (m, 137 H, CH<sub>2</sub>), 3.72 (br s, 145 H, CH), 4.91 (br s, 136 H, OH), 7.24 (m, 2 H, CH), 7.82 (m, 4 H, CH), 8.45 (m, 2 H, CH)

<sup>13</sup>C NMR (176 MHz, DMSO-*d*<sub>6</sub>)  $\delta$  ppm 41.9 (s, 1 C, CH<sub>2</sub>), 42.0 (s, 1 C, CH<sub>2</sub>), 70.5 (s, 1 C, CH), 70.6 (s, 1 C, CH), 119.3 (s, 1 C, CH), 121.1 (s, 1 C, CH), 137.8 (s, 1 C, CH), 149.5 (s, 1 C, CH), 159.4 (s, 1 C, CH)

### Synthesis of p(DTT<sub>14</sub>-co-pBDT<sub>9</sub>)

BDT (1034 mg, 8.45 mmol, 1 eq.) was placed in a N<sub>2</sub> flushed Schlenk flask. DTT (1854 mg, 12.02 mmol, 1 eq.) was added. Anhydrous DMF (4 mL) was added and DPDS (4777 mg, 21.68 mmol, 2.57 eq) was added as soon as DTT was completely dissolved. Then anhydrous DMF (2 mL) was added. The mixture was cooled by an ice bath for 5 min. After 20 h the mixture was diluted with DMF (1.5 mL) and precipitated into four 30 mL centrifuge tubes with 1:1 chloroform/isohehexane mixture and centrifuged for 15 min. The precipitate was dissolved in a DMF-THF mixture and precipitated again. The precipitation was repeated four times to give a yellow solid that was dried in vacuo overnight. Yield: 687.8 mg, 21%;  $M_{n,NMR} \approx 3430 \text{ g mol}^{-1}$ ,  $M_{n,GPC} \approx 3600 \text{ g mol}^{-1}$

<sup>1</sup>H NMR (500 MHz, DMSO-*d*<sub>6</sub>)  $\delta$  ppm 1.73 (m, 37 H),  
2.76 (m, 57 H), 2.91 (m, 36 H), 3.73 (m, 29 H), 4.91 (m, 28 H), 7.24 (m, 2 H),  
7.82 (m, 4 H), 8.45 (m, 2 H)

### Synthesis of p(DTT<sub>16</sub>-co-pBDT<sub>7</sub>)

BDT (721 mg, 5.89 mmol, 1 eq.) was placed in a N<sub>2</sub> flushed Schlenk flask. DTT (2122 mg, 13.76 mmol, 2.33 eq.) was added. Anhydrous DMF (4 mL) was added and DPDS (4436 mg, 20.13 mmol, 3.42 eq) was added as soon as DTT was completely dissolved. Anhydrous DMF (2 mL) was added. The mixture was cooled by an ice bath for 5 min. After 17 h the mixture was diluted with DMF (1.5 mL) and precipitated into four 30 mL centrifuge tubes with 1:1 chloroform/isohehexane mixture and centrifuged for 15 min. The precipitate was dissolved in a DMF-THF mixture and precipitated again. The precipitation was repeated four times to give a yellow solid that was dried in vacuo overnight. Yield: 990.3 mg, 33%;  $M_{n,NMR} \approx 3500 \text{ g mol}^{-1}$ ,  $M_{n,GPC} \approx 3900 \text{ g mol}^{-1}$

<sup>1</sup>H NMR (500 MHz, DMSO-*d*<sub>6</sub>)  $\delta$  ppm 1.74 (m, 27 H), 2.76 (m, 57 H), 2.91 (m, 36 H), 3.74 (m, 32 H),  
4.92 (m, 31 H), 7.25 (m, 2 H), 7.83 (m, 4 H), 8.46 (m, 2 H)

### Synthesis of p(DTT<sub>22</sub>-co-pBDT<sub>3</sub>)

BDT (381 mg, 3.12 mmol, 1 eq.) was placed in a N<sub>2</sub> flushed Schlenk flask. DTT (2673 mg, 17.33 mmol, 5.56 eq.) was added. Anhydrous DMF (4 mL) was added and DPDS (4617 mg, 20.96 mmol, 6.72 eq) was added as soon as DTT was completely dissolved. Then anhydrous DMF (2 mL) was added. The mixture was cooled by an ice bath for 5 min. After 4 h the mixture was diluted with DMF (1.5 mL) and precipitated into four 30 mL centrifuge tubes with 1:1 chloroform/isohehexane mixture and centrifuged for 15 min. The precipitate was dissolved in a DMF-THF mixture and precipitated again. The

precipitation was repeated four times to give a yellow solid that was dried in vacuo overnight. Yield: 1282.8 mg, 40%;  $M_{n,NMR} \approx 3930 \text{ g mol}^{-1}$ ,  $M_{n,GPC} \approx 3800 \text{ g mol}^{-1}$   
 $^1\text{H NMR}$  (500 MHz,  $\text{DMSO-}d_6$ )  $\delta$  ppm 1.74 (m, 13 H), 2.78 (br d,  $J=9.4$  Hz, 50 H), 2.92 (br d,  $J=2.1$  Hz, 38 H), 3.73 (br s, 44 H), 4.92 (m, 44 H), 7.25 (m, 2 H), 7.83 (m, 4 H), 8.46 (m, 2 H)

### $^1\text{H-NMR}$ Degradation Study

Approximately 20 mg of polymer were dissolved in 600  $\mu\text{L}$   $\text{DMSO-}d_6$  (precise concentrations of polymer concentrations in Table S1).  $^1\text{H-NMR}$  spectrum was recorded. A GSH stock solution was prepared ( $c_{\text{GSH,stock}}$  see Table S1) and 2 equivalents in respect to the polymer were added (volumes see Table S1) and the tube was shaken to mix.  $^1\text{H-NMR}$  spectrum was recorded immediately after addition at 30 °C internal temperature.

*Table S1: Concentrations and volumes used for  $^1\text{H-NMR}$  degradation experiment, GSH stock solution was added to polymer solution to achieve  $c_{\text{GSH}}$  in solution*

|                                            |                                                |        |
|--------------------------------------------|------------------------------------------------|--------|
| pDTT <sub>21</sub>                         | $c_{\text{Polymer}}$ [mmol L <sup>-1</sup> ]   | 8.78   |
|                                            | $c_{\text{GSH,stock}}$ [mmol L <sup>-1</sup> ] | 741.87 |
|                                            | $c_{\text{GSH}}$ [mmol L <sup>-1</sup> ]       | 17.15  |
|                                            | volume GSH stock added [ $\mu\text{L}$ ]       | 14.2   |
| pDTT <sub>36</sub>                         | $c_{\text{Polymer}}$ [mmol L <sup>-1</sup> ]   | 5.44   |
|                                            | $c_{\text{GSH,stock}}$ [mmol L <sup>-1</sup> ] | 670.29 |
|                                            | $c_{\text{GSH}}$ [mmol L <sup>-1</sup> ]       | 10.70  |
|                                            | volume GSH stock added [ $\mu\text{L}$ ]       | 9.7    |
| pDTT <sub>69</sub>                         | $c_{\text{Polymer}}$ [mmol L <sup>-1</sup> ]   | 3.56   |
|                                            | $c_{\text{GSH,stock}}$ [mmol L <sup>-1</sup> ] | 533.63 |
|                                            | $c_{\text{GSH}}$ [mmol L <sup>-1</sup> ]       | 7.02   |
|                                            | volume GSH stock added [ $\mu\text{L}$ ]       | 8.0    |
| p(DTT <sub>22</sub> -co-BDT <sub>3</sub> ) | $c_{\text{Polymer}}$ [mmol L <sup>-1</sup> ]   | 8.04   |
|                                            | $c_{\text{GSH,stock}}$ [mmol L <sup>-1</sup> ] | 709.34 |
|                                            | $c_{\text{GSH}}$ [mmol L <sup>-1</sup> ]       | 15.71  |
|                                            | volume GSH stock added [ $\mu\text{L}$ ]       | 13.6   |
| p(DTT <sub>16</sub> -co-BDT <sub>7</sub> ) | $c_{\text{Polymer}}$ [mmol L <sup>-1</sup> ]   | 8.98   |
|                                            | $c_{\text{GSH,stock}}$ [mmol L <sup>-1</sup> ] | 676.80 |
|                                            | $c_{\text{GSH}}$ [mmol L <sup>-1</sup> ]       | 17.49  |
|                                            | volume GSH stock added [ $\mu\text{L}$ ]       | 15.9   |
| p(DTT <sub>14</sub> -co-BDT <sub>9</sub> ) | $c_{\text{Polymer}}$ [mmol L <sup>-1</sup> ]   | 8.10   |

|                                                |        |
|------------------------------------------------|--------|
| $c_{\text{GSH,stock}}$ [mmol L <sup>-1</sup> ] | 683.30 |
| $c_{\text{GSH}}$ [mmol L <sup>-1</sup> ]       | 15.82  |
| volume GSH stock added [ $\mu\text{L}$ ]       | 14.2   |

# Polymer Analysis

## GPC Analysis

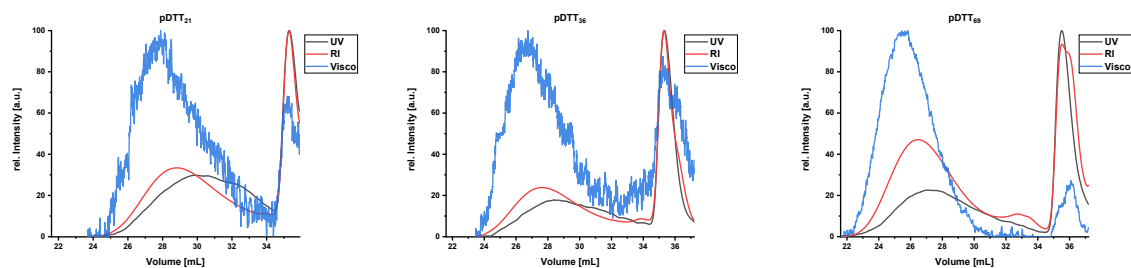

Figure S1: Elution curves of homopolymer pDTT<sub>21</sub>, pDTT<sub>36</sub>, and pDTT<sub>69</sub> in DMAc + 0.5 g L<sup>-1</sup> LiBr, BHT internal standard signal at 35.2 mL

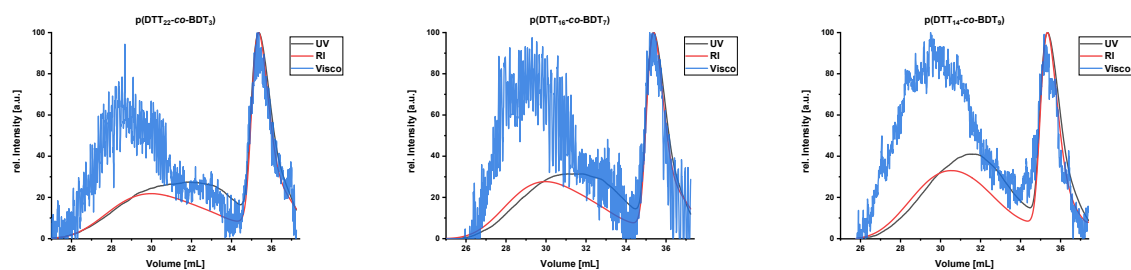

Figure S2: Elution curves of copolymer <sup>1</sup>H-NMR of p(DTT<sub>22</sub>-co-BDT<sub>3</sub>), <sup>1</sup>H-NMR of p(DTT<sub>16</sub>-co-BDT<sub>7</sub>), and <sup>1</sup>H-NMR of p(DTT<sub>14</sub>-co-BDT<sub>9</sub>) in DMAc + 0.5 g L<sup>-1</sup> LiBr, BHT internal standard signal at 35.2 mL

# NMR Analysis

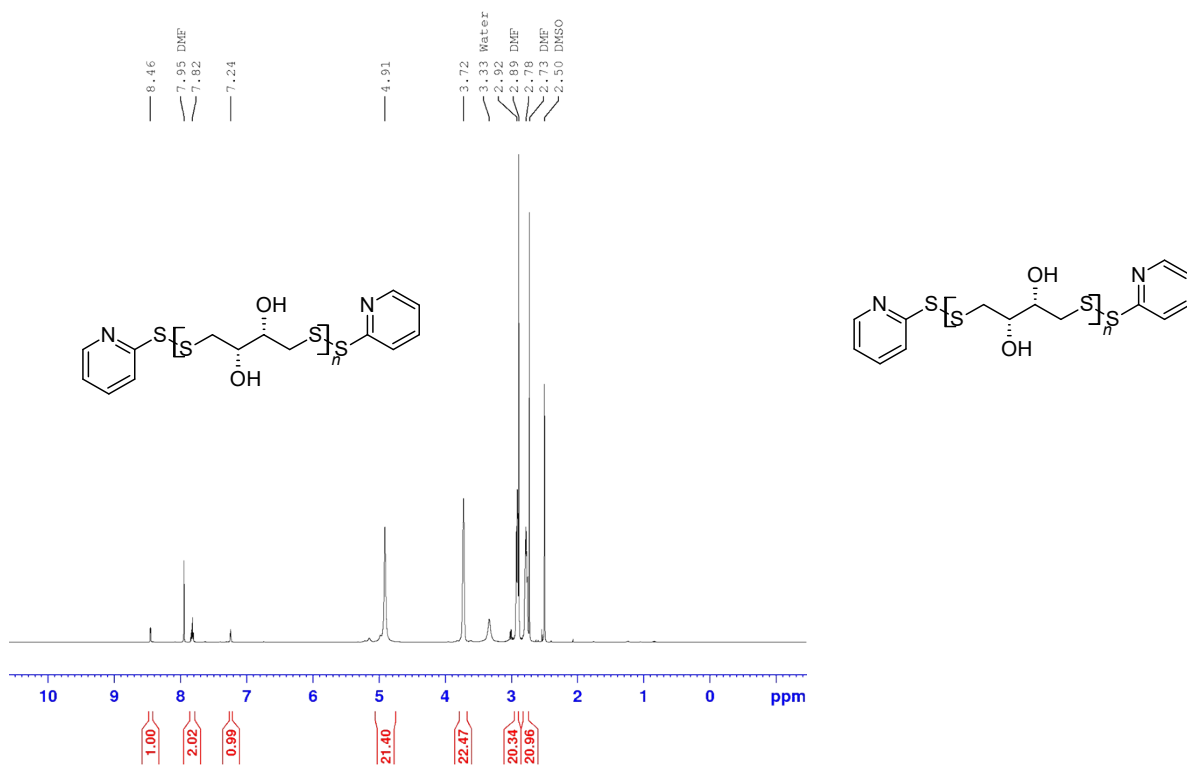

Figure S3:  $^1\text{H-NMR}$  of  $\text{pDTT}_{21}$

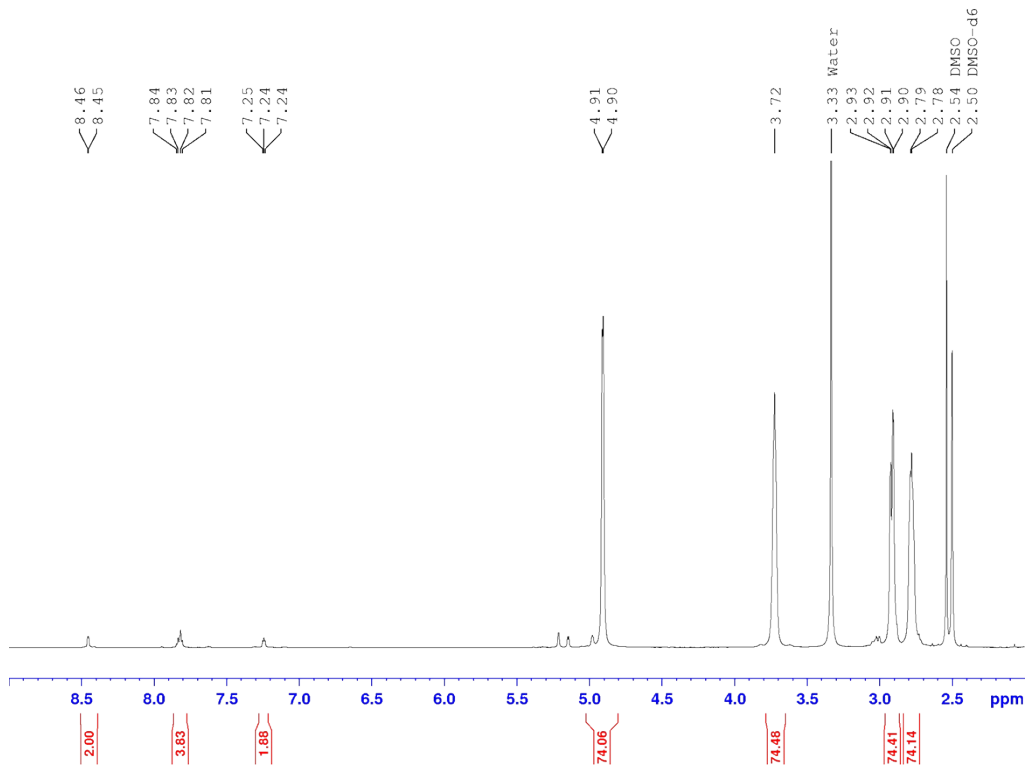

Figure S4:  $^1\text{H-NMR}$  of  $\text{pDTT}_{36}$  (purified by dialysis)

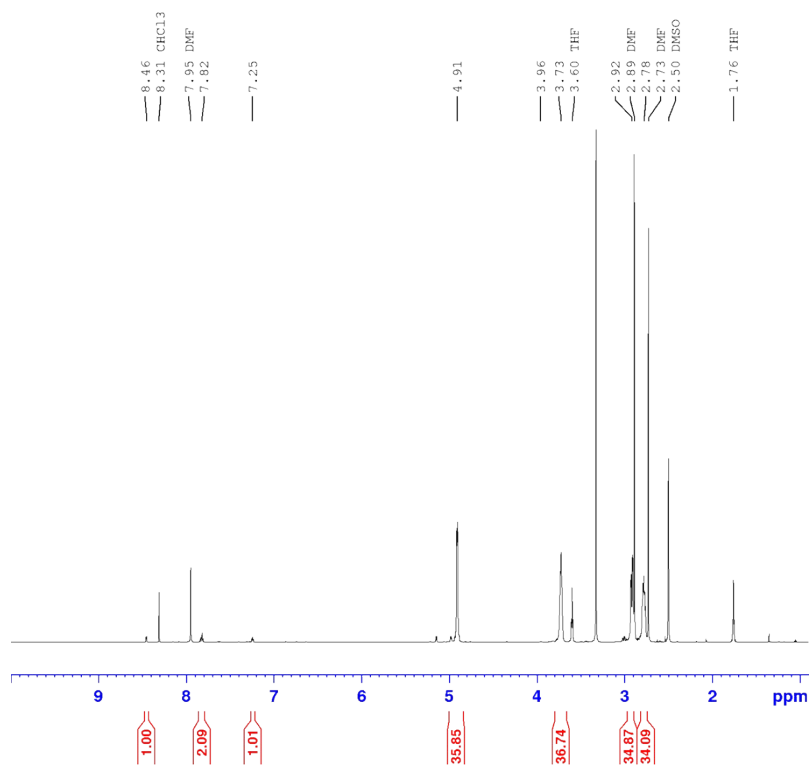

Figure S5: <sup>1</sup>H-NMR of pDTT<sub>36</sub>

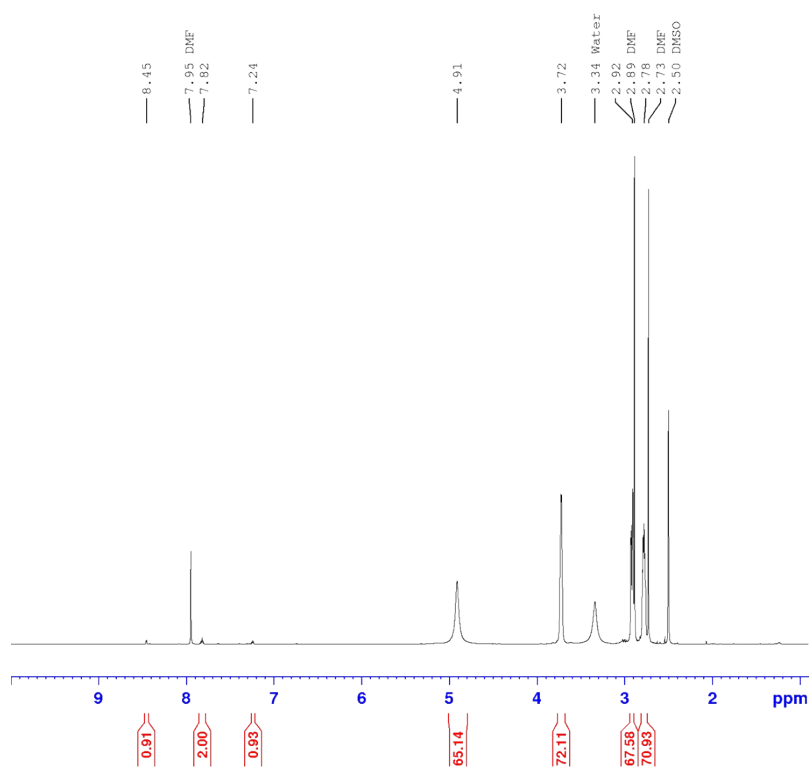

Figure S6: <sup>1</sup>H-NMR of pDTT<sub>69</sub>



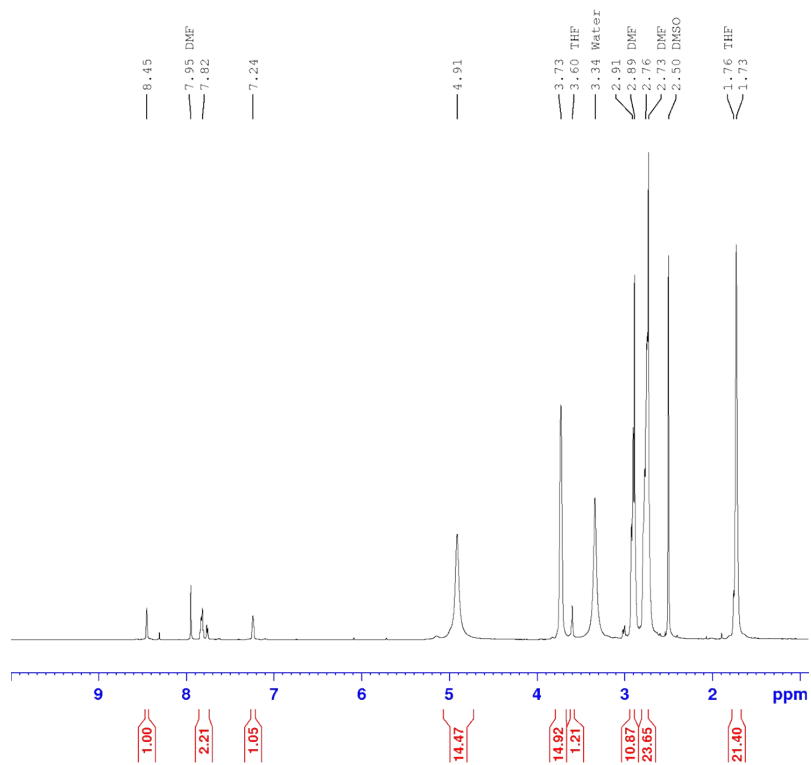

Figure S7:  $^1\text{H-NMR}$  of  $p(\text{DTT}_{14}\text{-co-BDT}_9)$

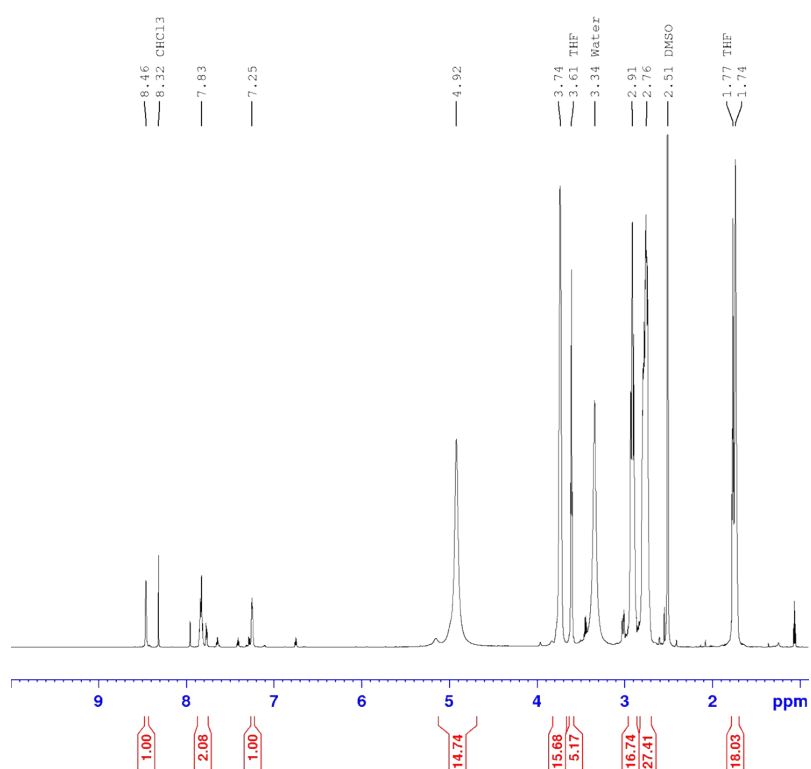

Figure S8:  $^1\text{H-NMR}$  of  $p(\text{DTT}_{16}\text{-co-BDT}_7)$

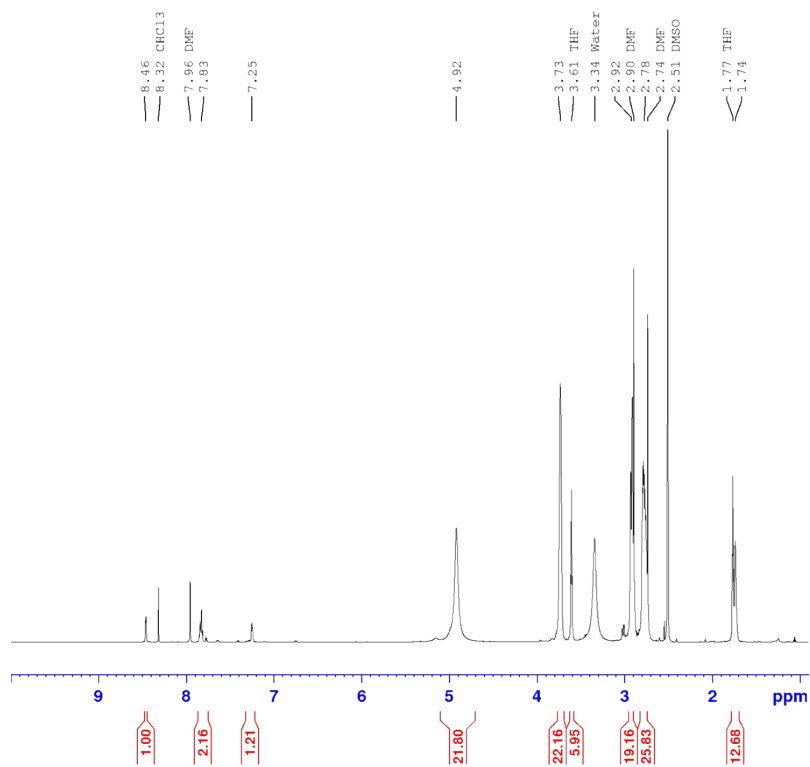

Figure S9: <sup>1</sup>H-NMR of p(DTT<sub>22</sub>-co-BDT<sub>3</sub>)

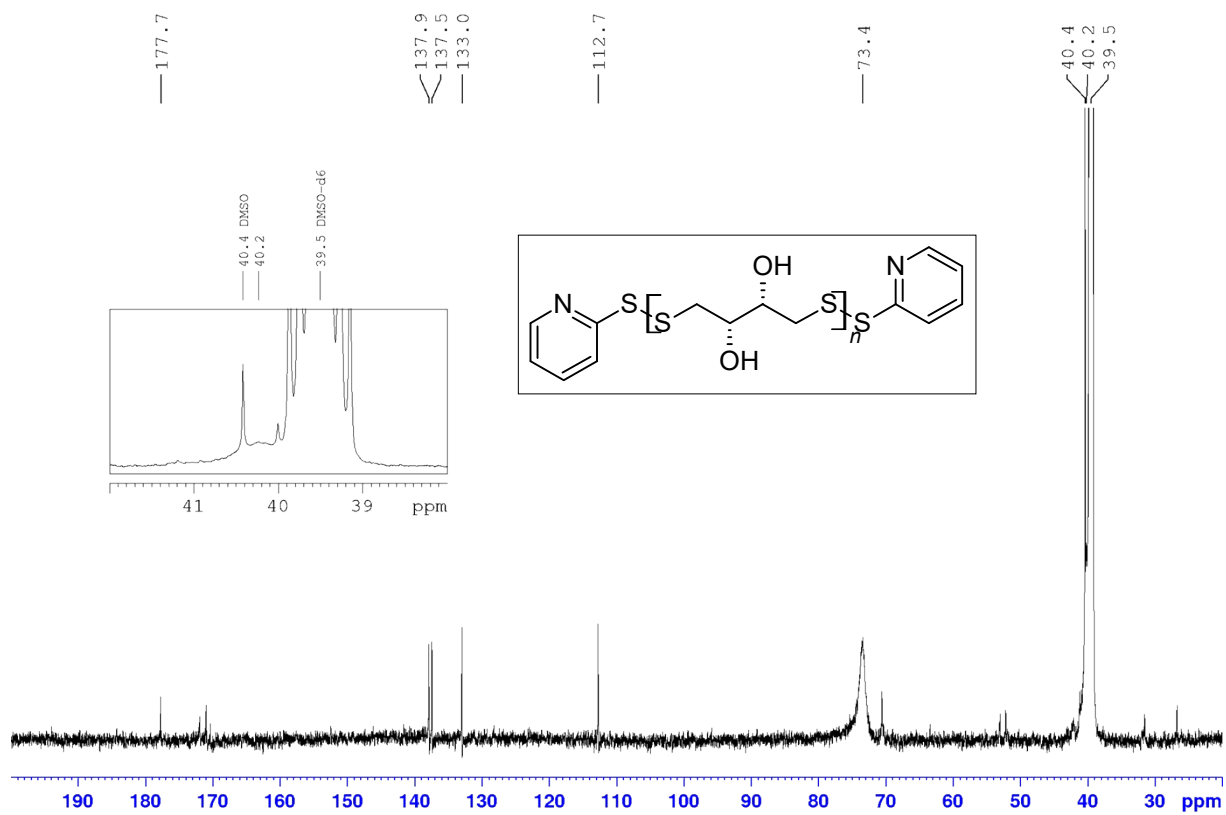

Figure S10: <sup>13</sup>C-NMR of pDTT<sub>36</sub>

## DSC Analysis

DSC analyses of the polymer samples were conducted using Netzsch DSC 204 F1 Phoenix at a heating rate of 10 K/min under nitrogen atmosphere.

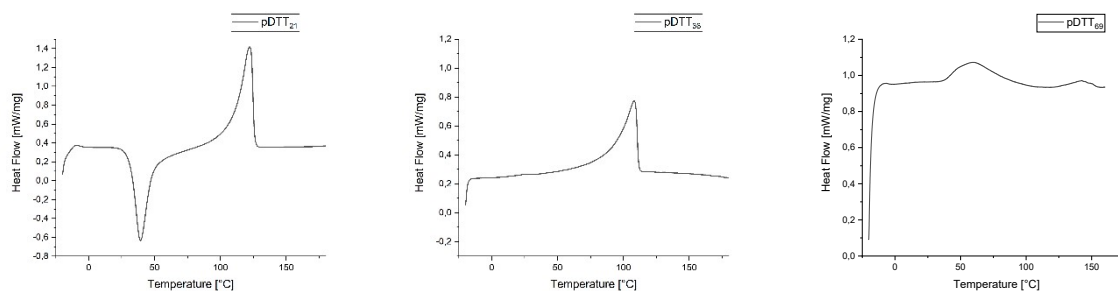

Figure S11: DSC Traces of homopolymers pDTT<sub>21</sub>, pDTT<sub>36</sub> and pDTT<sub>69</sub>

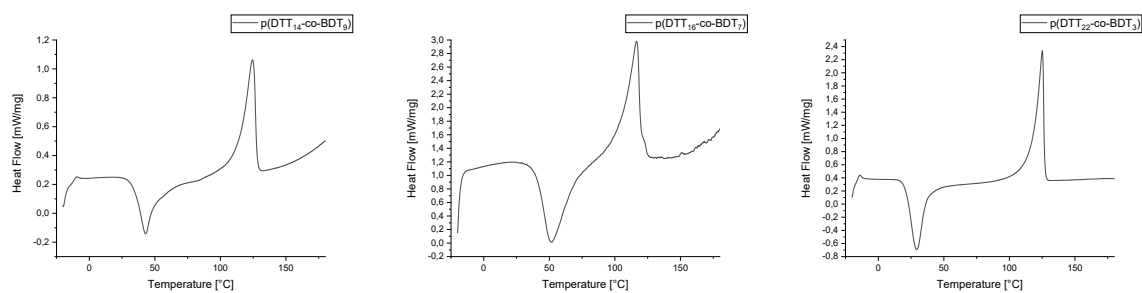

Figure S12: DSC Traces of copolymers p(DTT<sub>14</sub>-co-BDT<sub>9</sub>), p(DTT<sub>16</sub>-co-BDT<sub>7</sub>) and p(DTT<sub>22</sub>-co-BDT<sub>3</sub>)

## Polymer Degradation

GPC results of pDTT<sub>36</sub>

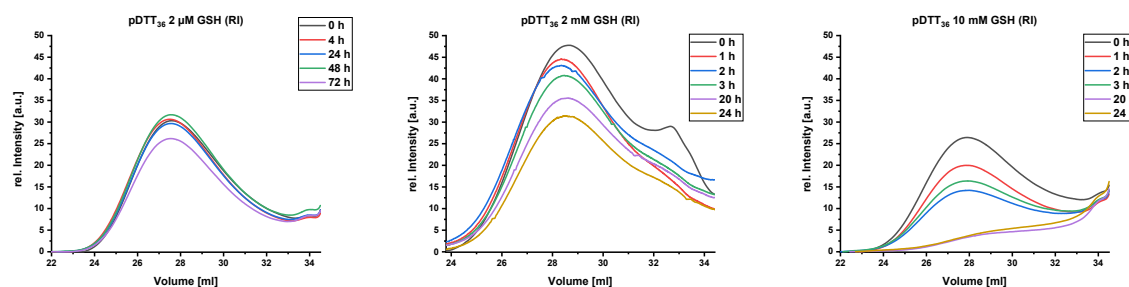

Figure S13: Degradation of pDTT<sub>36</sub> RI Detector

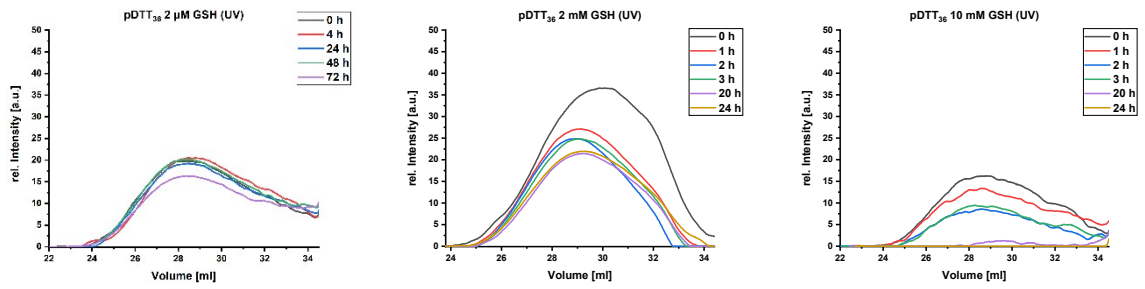

Figure S14: Degradation of pDTT<sub>36</sub> UV Detector

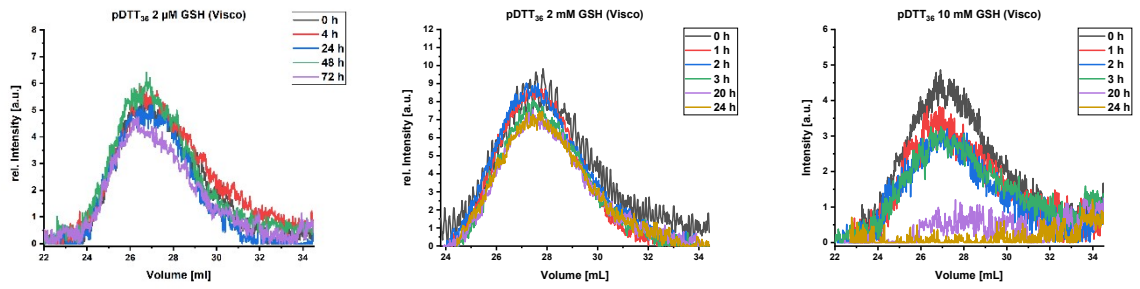

Figure S15: Degradation of pDTT<sub>36</sub> Viscosity Detector

### GPC results of pDTT<sub>69</sub>

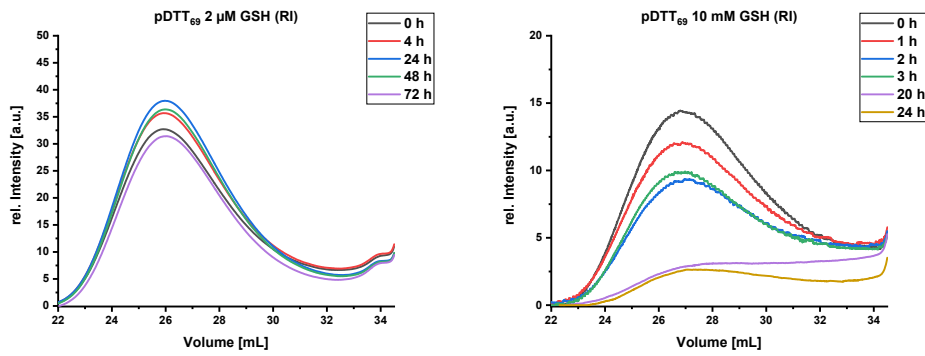

Figure S16: Degradation of pDTT<sub>69</sub>RI Detector

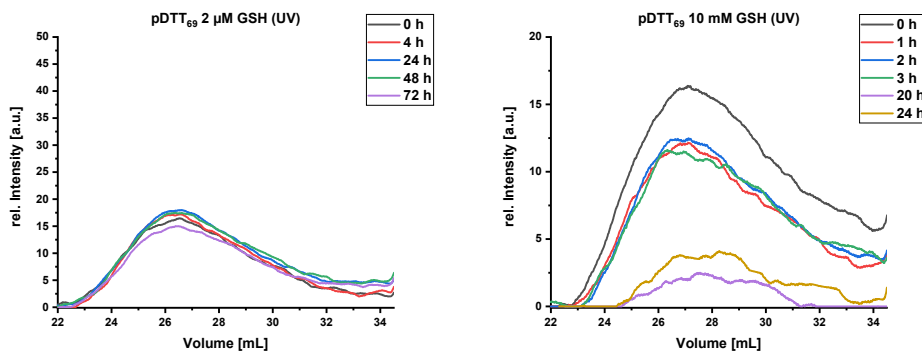

Figure S17: Degradation of pDTT<sub>69</sub> UV Detector

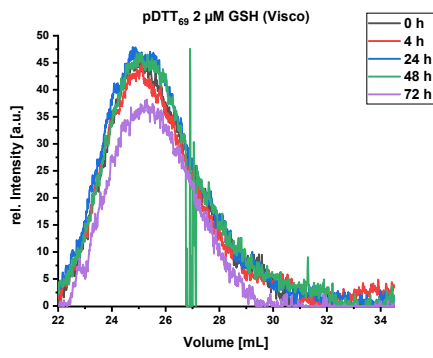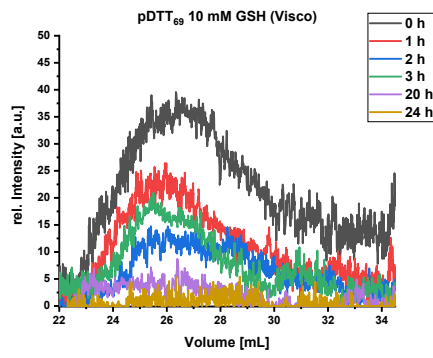

Figure S18: Degradation of pDTT<sub>69</sub> UV Detector

GPC results of pDTT<sub>21</sub>

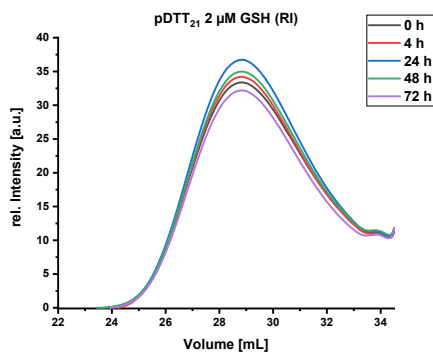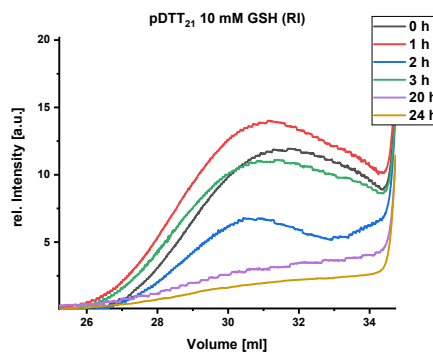

Figure S19: Degradation of pDTT<sub>21</sub> RI Detector

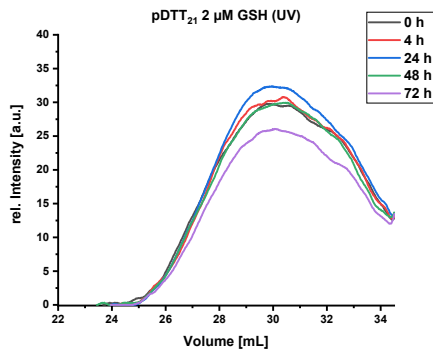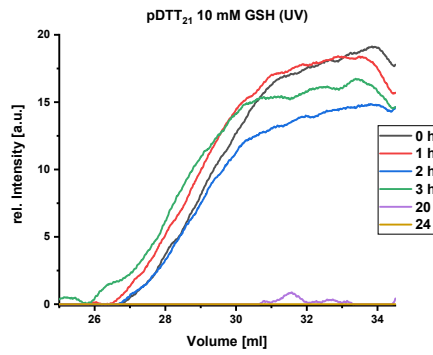

Figure S20: Degradation of pDTT<sub>21</sub> UV Detector

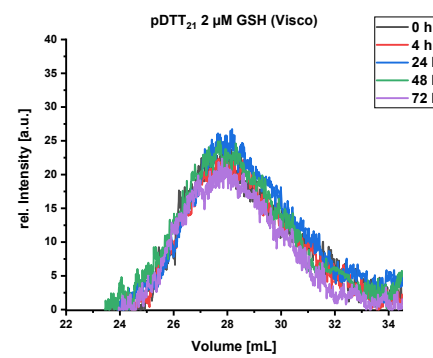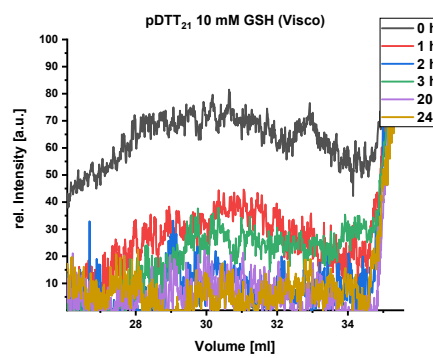

Figure S21: Degradation of pDTT<sub>21</sub> Visco Detector



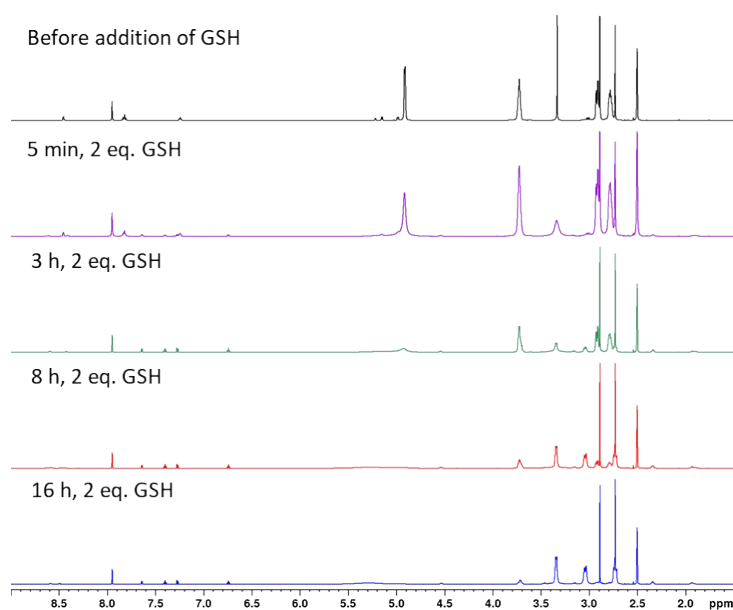

Figure S24:  $^1\text{H-NMR}$  study of degradation of  $\text{pDTT}_{21}$  by 2 eq. GSH, spectra recorded after 5 min, 3 h, 8 h and 16 h

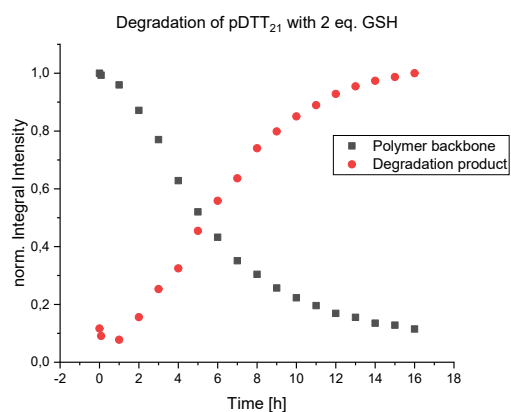

Figure S25:  $^1\text{H-NMR}$  study of degradation of  $\text{pDTT}_{69}$  by 2 eq. GSH. Integral Intensities normalized to maximum value before addition of GSH (backbone) and after 16 h (degradation product), spectra recorded 5 min after addition, then hourly

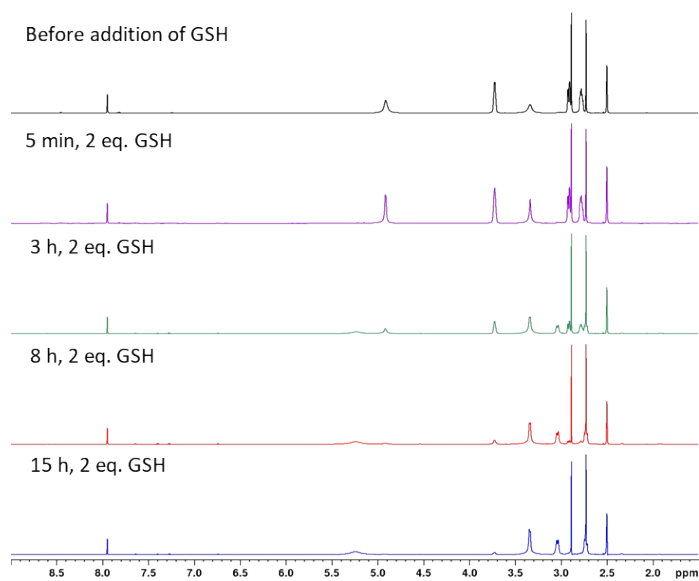

Figure S26:  $^1\text{H-NMR}$  study of degradation of  $\text{pDTT}_{69}$  by 2 eq. GSH, spectra recorded after 5 min, 3 h, 8 h and 15 h

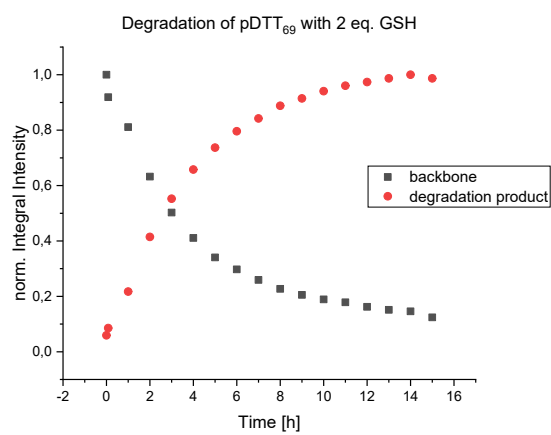

Figure S27:  $^1\text{H-NMR}$  study of degradation of  $\text{pDTT}_{69}$  by 2 eq. GSH. Integral Intensities normalized to maximum value before addition of GSH (backbone) and after 15 h (degradation product), spectra recorded 5 min after addition, then hourly



# Copolymer Degradation

## GPC Results of $p(\text{DTT}_{14}\text{-co-BDT}_9)$

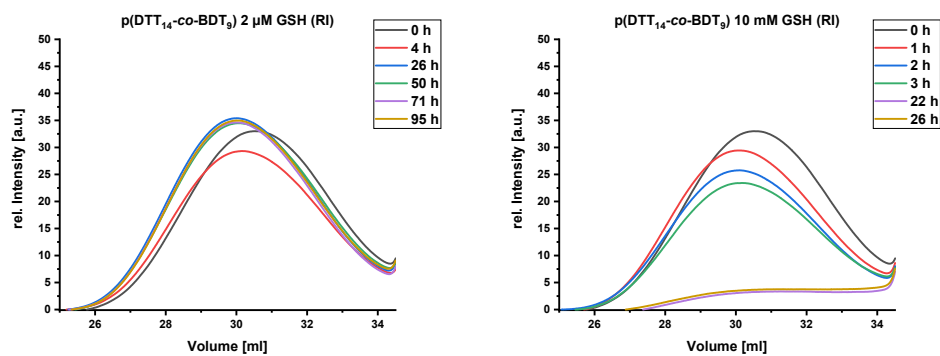

Figure S28: Degradation of  $p(\text{DTT}_{14}\text{-co-BDT}_9)$  RI Detector

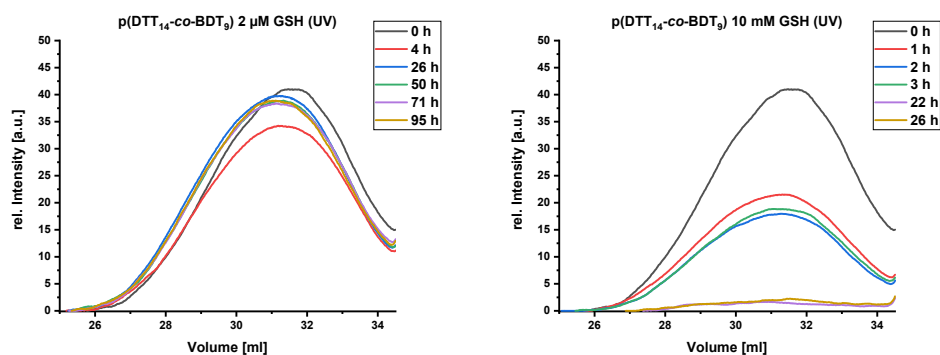

Figure S29: Degradation of  $p(\text{DTT}_{14}\text{-co-BDT}_9)$  UV Detector

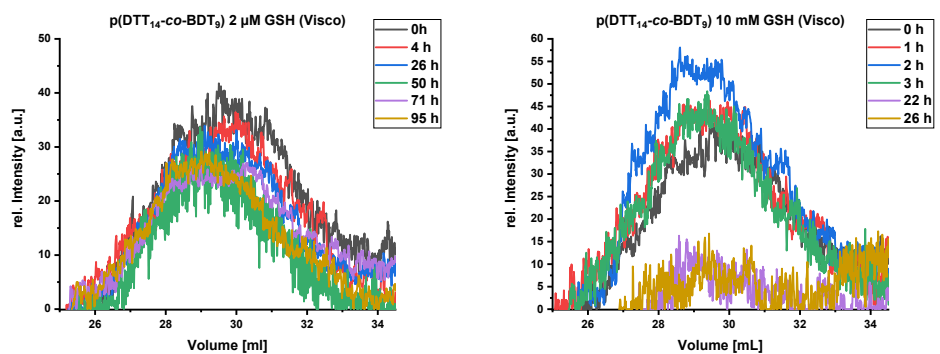

Figure S30: Degradation of  $p(\text{DTT}_{14}\text{-co-BDT}_9)$  Visco Detector

## GPC Results of p(DTT<sub>16</sub>-co-BDT<sub>7</sub>)

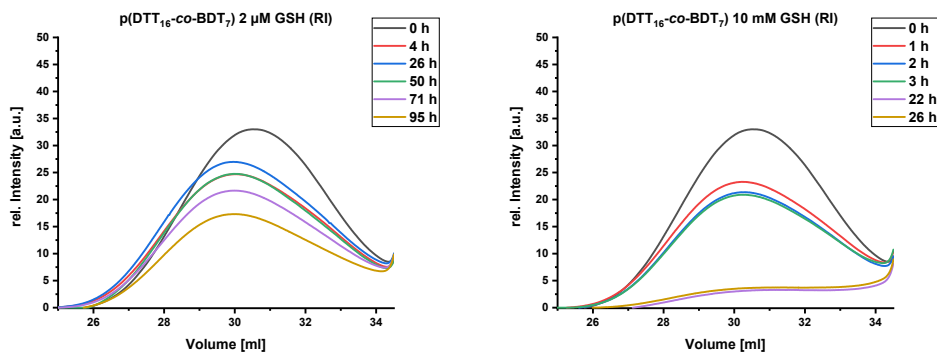

Figure S31: Degradation of p(DTT<sub>16</sub>-co-BDT<sub>7</sub>) RI Detector

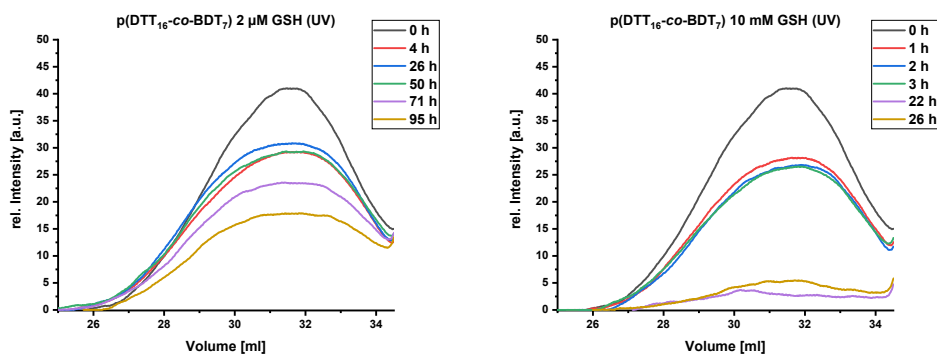

Figure S32: Degradation of p(DTT<sub>16</sub>-co-BDT<sub>7</sub>) UV Detector

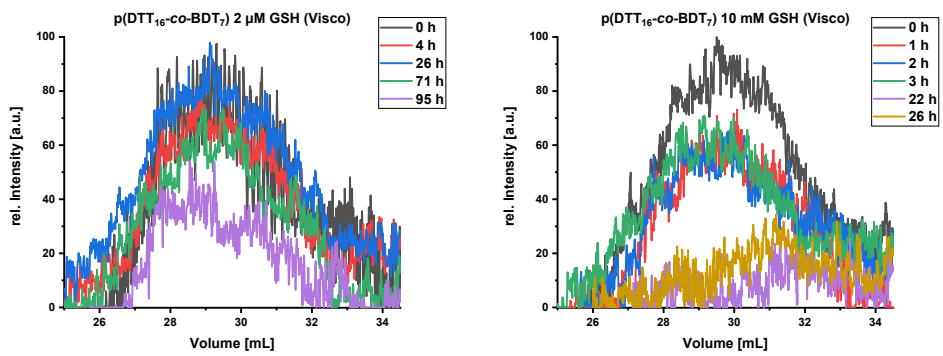

Figure S33: Degradation of p(DTT<sub>16</sub>-co-BDT<sub>7</sub>) Viscosity Detector

## GPC Results of $p(\text{DTT}_{22}\text{-co-BDT}_3)$

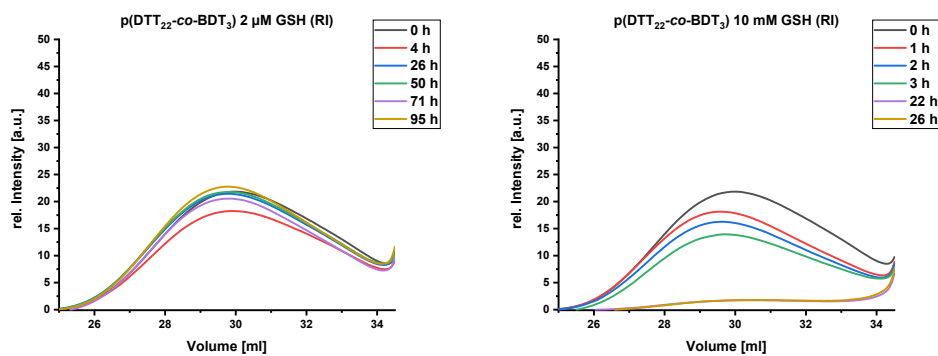

Figure S34: Degradation of  $p(\text{DTT}_{22}\text{-co-BDT}_3)$  RI Detector

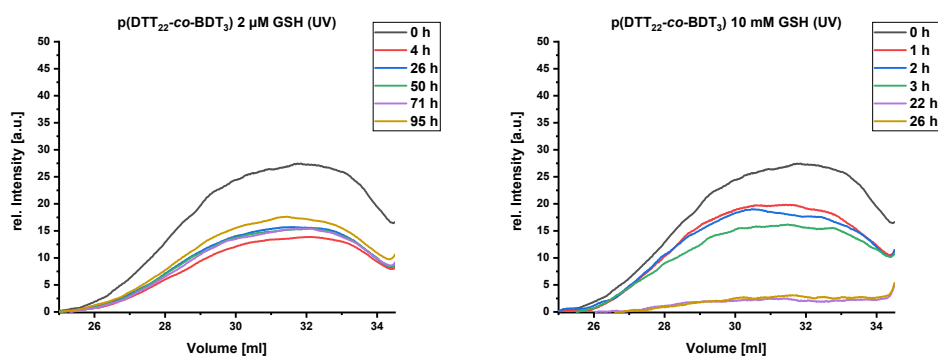

Figure S35: Degradation of  $p(\text{DTT}_{22}\text{-co-BDT}_3)$  UV Detector

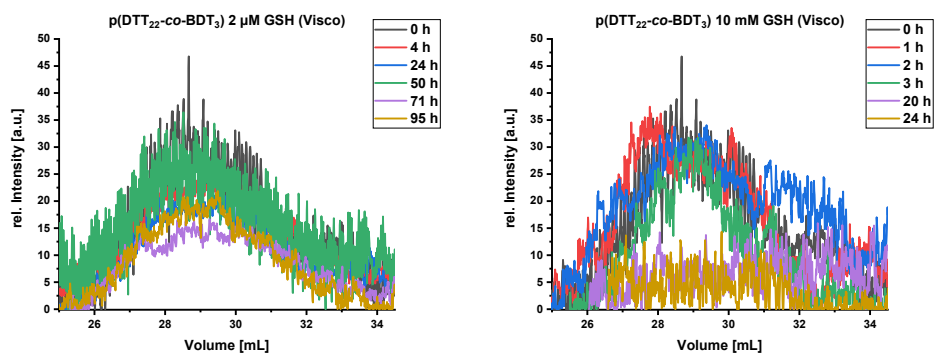

Figure S36: Degradation of  $p(\text{DTT}_{22}\text{-co-BDT}_3)$  Viscosity Detector

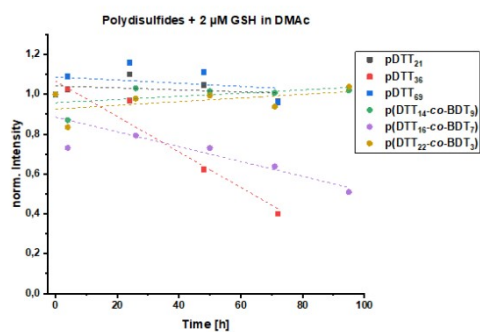

Figure S37: Degradation of homopolymers  $p\text{DTT}_{21}$ ,  $p\text{DTT}_{36}$ ,  $p\text{DTT}_{69}$ , copolymers  $p(\text{DTT}_{14}\text{-co-BDT}_3)$ ,  $p(\text{DTT}_{16}\text{-co-BDT}_7)$ ,  $p(\text{DTT}_{22}\text{-co-BDT}_3)$  in presence of  $2 \mu\text{M GSH}$  in DMAc +  $0.5 \text{ g L}^{-1}$

## $^1\text{H-NMR}$ results of Copolymer Degradation

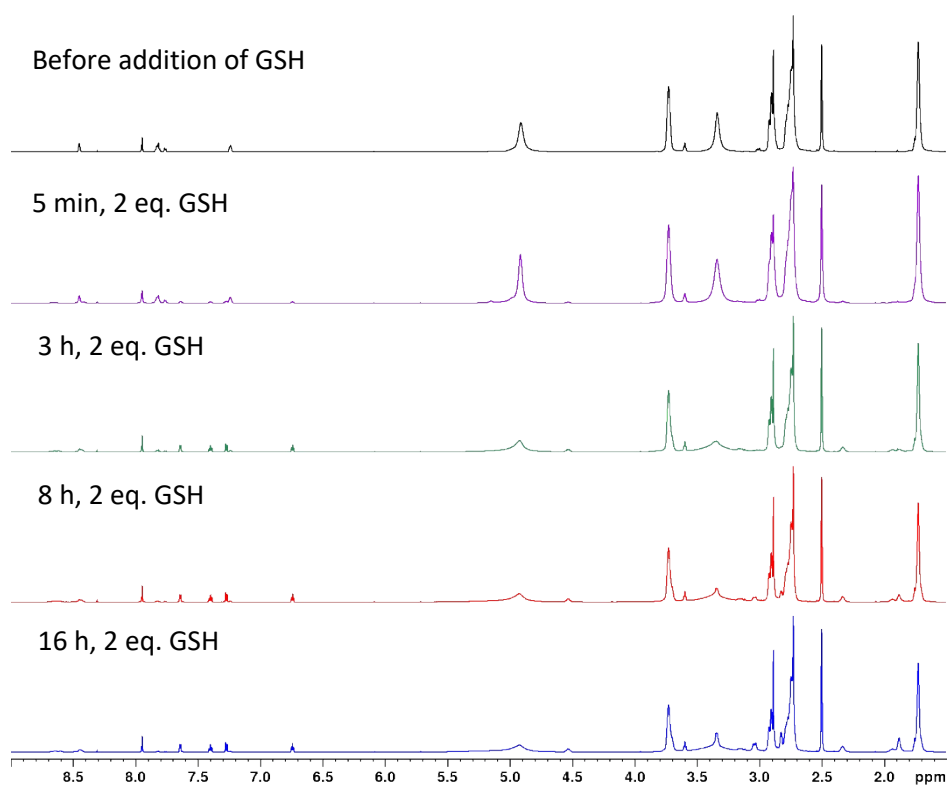

Figure S38:  $^1\text{H-NMR}$  study of degradation of  $p(\text{DTT}_{14}\text{-co-BDT}_9)$  by 2 eq. GSH, spectra recorded after 5 min, 3 h, 8 h and 16 h

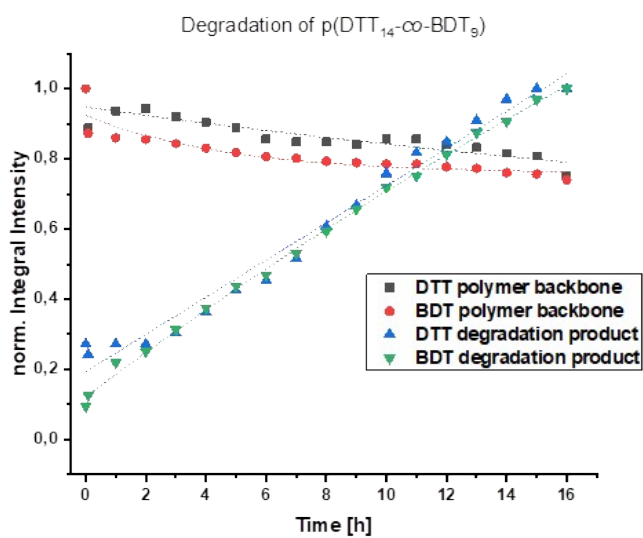

Figure S39:  $^1\text{H-NMR}$  study of degradation of  $p(\text{DTT}_{14}\text{-co-BDT}_9)$  by 2 eq. GSH. Integral Intensities normalized to maximum value before addition of GSH (backbone) and after 16 h (degradation product), spectra recorded 5 min after addition, then hourly

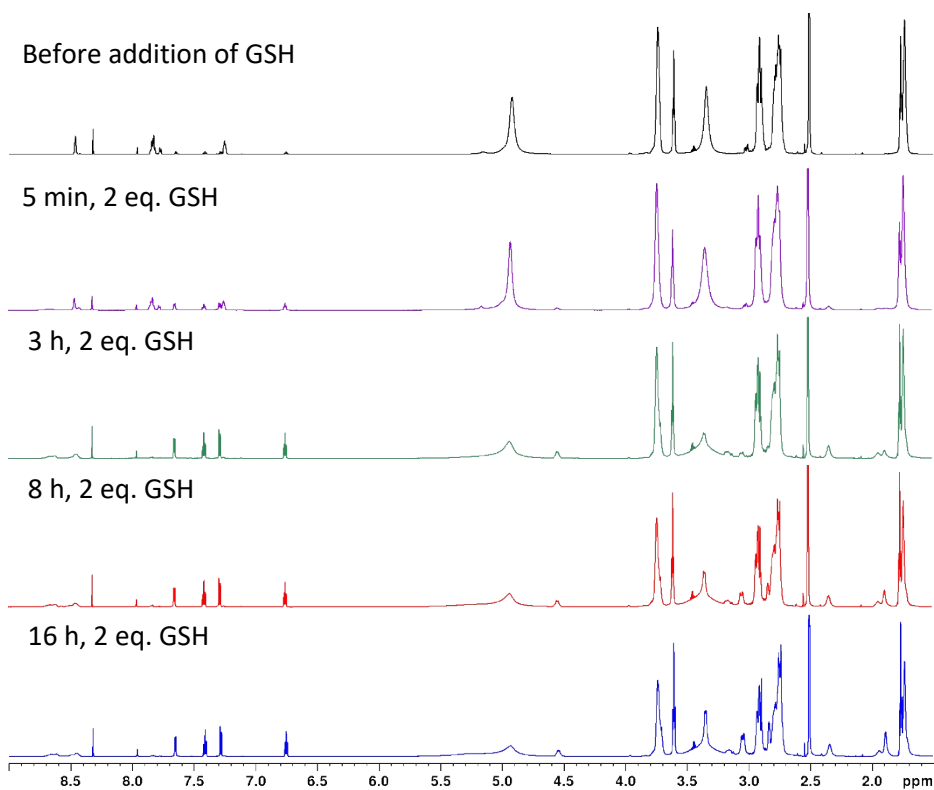

Figure S40:  $^1\text{H-NMR}$  study of degradation of  $p(\text{DTT}_{16}\text{-co-BDT}_7)$  by 2 eq. GSH, spectra recorded after 5 min, 3 h, 8 h and 16 h

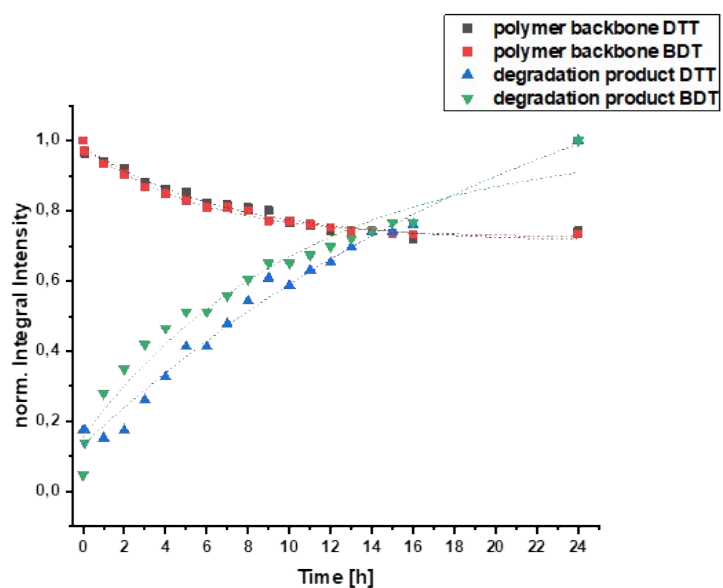

Figure S41:  $^1\text{H-NMR}$  study of degradation of  $p(\text{DTT}_{16}\text{-co-BDT}_7)$  by 2 eq. GSH. Integral Intensities normalized to maximum value before addition of GSH (backbone) and after 16 h (degradation product), spectra recorded 5 min after addition, then hourly

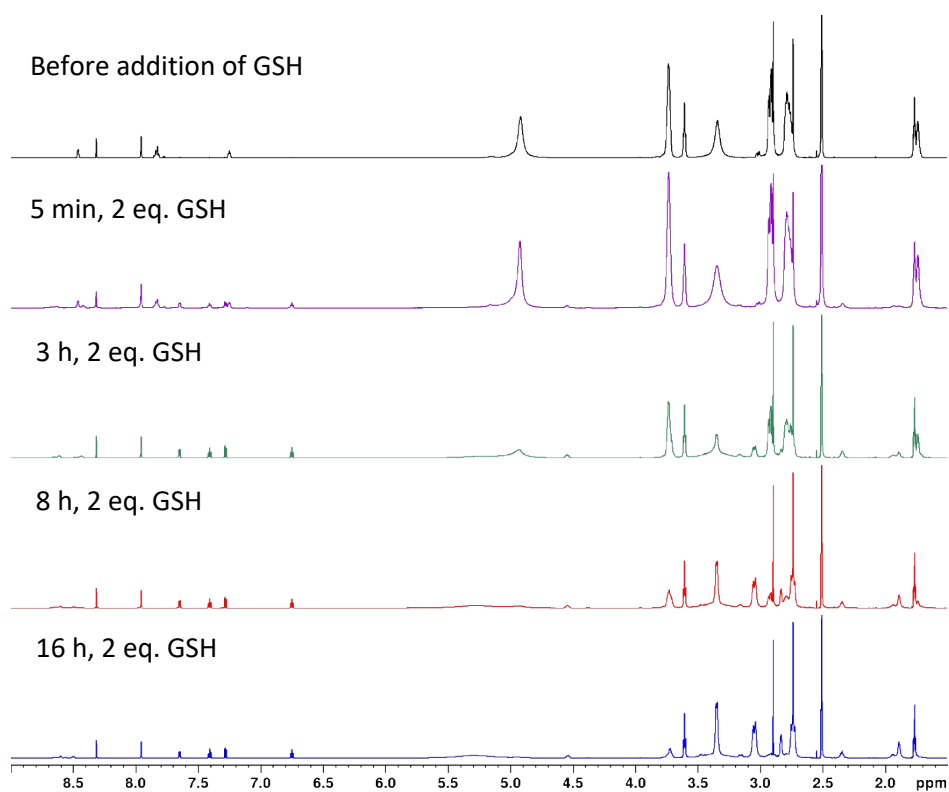

Figure S42:  $^1\text{H-NMR}$  study of degradation of  $p(\text{DTT}_{22}\text{-co-BDT}_3)$  by 2 eq. GSH, spectra recorded after 5 min, 3 h, 8 h and 16 h

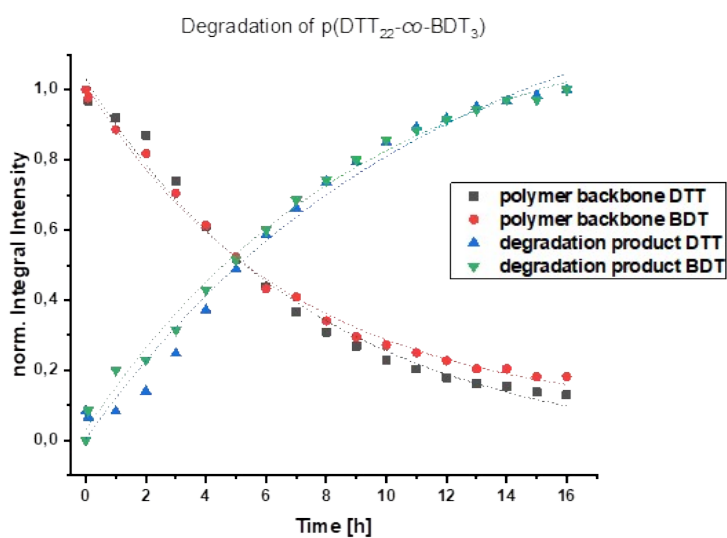

Figure S43:  $^1\text{H-NMR}$  study of degradation of  $p(\text{DTT}_{22}\text{-co-BDT}_3)$  by 2 eq. GSH. Integral Intensities normalized to maximum value before addition of GSH (backbone) and after 16 h (degradation product), spectra recorded 5 min after addition, then hourly

# Particle Degradation

## Blank Particles

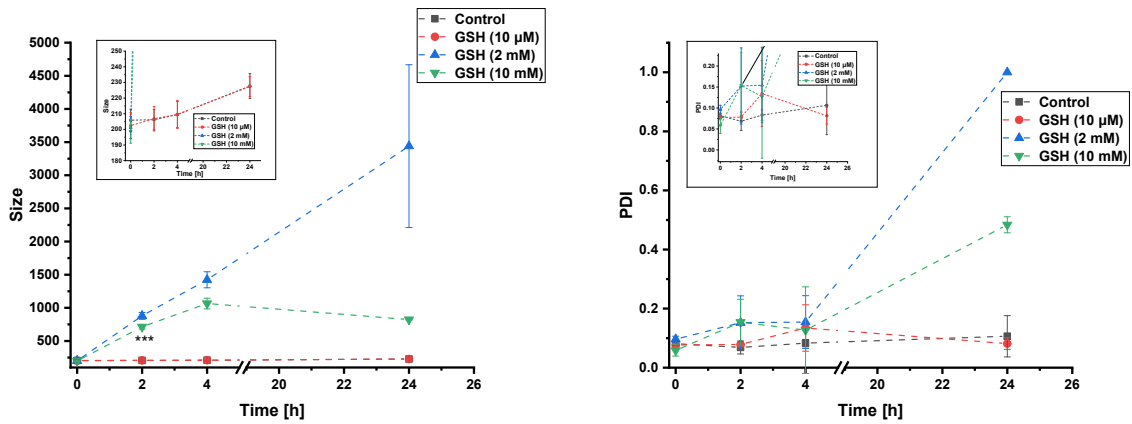

Figure S44: DLS size and PDI of pDTT<sub>36</sub> particles during incubation with different GSH (mean ± SD; n = 3). Significant differences in relative count rate between physiological and pathological conditions were labelled (\*\*\*) (p ≤ 0.001).

## Nile Red particles

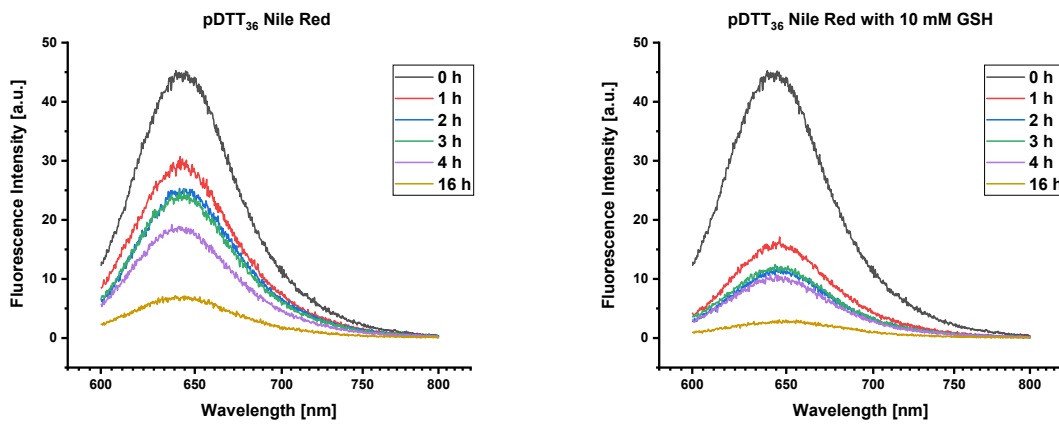

Figure S45: Fluorescence intensity of pDTT<sub>36</sub>-Nile Red particles without and with 10 mM GSH

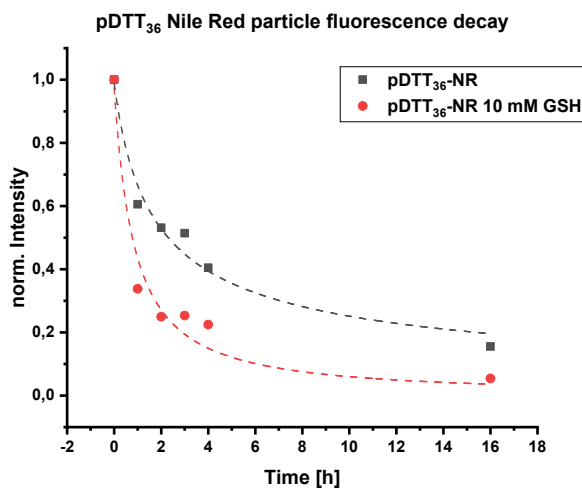

Figure S46: Normalized fluorescence intensity of pDTT<sub>36</sub> Nile Red (NR) particles without and with 10 mM GSH at  $\lambda_{max}=639$  nm

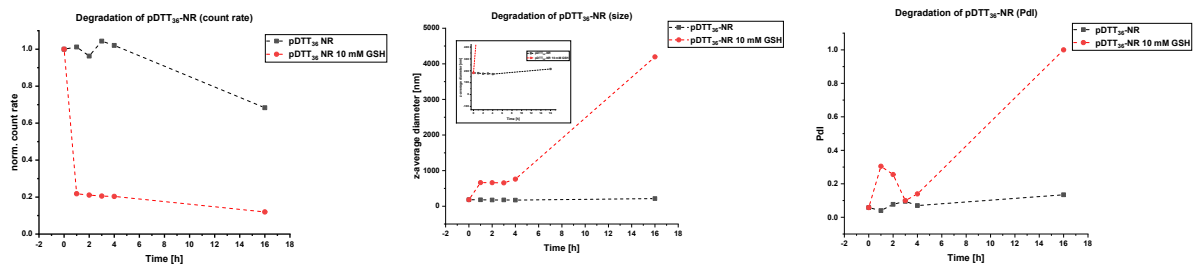

Figure S47: Normalized count rate, z-average diameter and polydispersity index of pDTT<sub>36</sub> Nile Red (NR) particles without and with 10 mM GSH

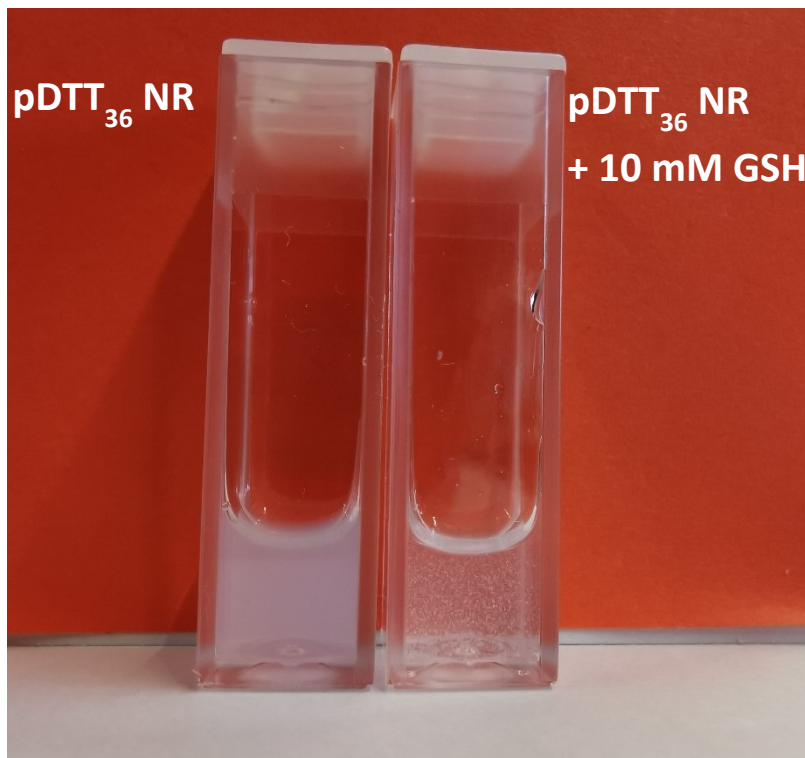

Figure S48: Undiluted pDTT<sub>36</sub> Nile Red (NR) particles stirred overnight at r.t. without and with 10 mM GSH

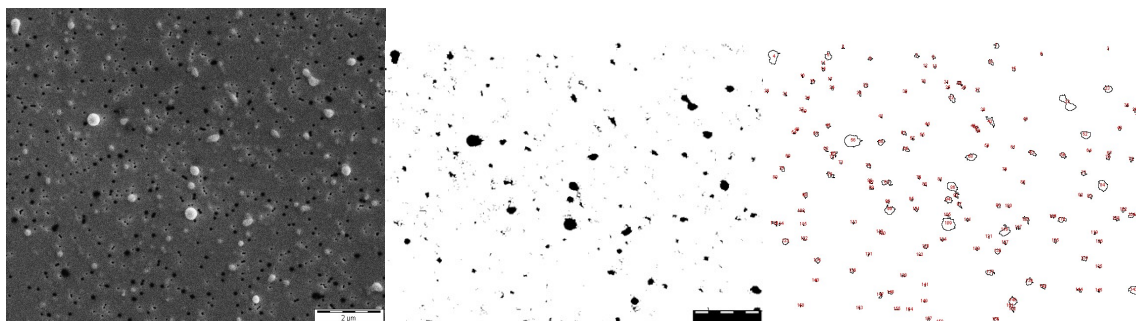

Figure S49: SEM image of pDTT<sub>36</sub> particles (left), grayscale extraction of particles (centre), automated particle counting by ImageJ (right)



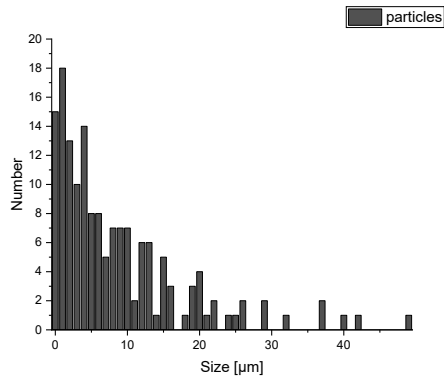

Figure S50: Size distribution of automated particle count by ImageJ (Figure S49)

Table S2: Results of automated particle count by Imagej

| No. | Area [µm <sup>2</sup> ] | Perimeter [µm] | Feret diameter [µm] | %Area | FeretX | FeretY | FeretAngle | MinFeret |
|-----|-------------------------|----------------|---------------------|-------|--------|--------|------------|----------|
| 1   | 0,017                   | 0,611          | 0,191               | 100   | 469    | 14     | 55,158     | 0,16     |
| 2   | 0,004                   | 0,339          | 0,122               | 100   | 161    | 9      | 120,823    | 0,091    |
| 3   | 0,001                   | 0,164          | 0,072               | 100   | 699    | 14     | 102,612    | 0,031    |
| 4   | 0,108                   | 1,497          | 0,51                | 100   | 19     | 18     | 97,037     | 0,346    |
| 5   | 0,04                    | 0,869          | 0,307               | 100   | 129    | 38     | 75,252     | 0,219    |
| 6   | 0,003                   | 0,195          | 0,084               | 100   | 563    | 25     | 123,871    | 0,047    |
| 7   | 0,011                   | 0,478          | 0,175               | 100   | 306    | 29     | 168,517    | 0,12     |
| 8   | 0,007                   | 0,367          | 0,14                | 100   | 342    | 30     | 141,407    | 0,103    |
| 9   | 0,009                   | 0,406          | 0,16                | 100   | 212    | 37     | 12,597     | 0,105    |
| 10  | 0,018                   | 0,612          | 0,244               | 100   | 458    | 37     | 120,823    | 0,143    |
| 11  | 0,002                   | 0,244          | 0,094               | 100   | 121    | 43     | 131,829    | 0,07     |
| 12  | 0,001                   | 0,141          | 0,061               | 100   | 329    | 50     | 120,823    | 0,043    |
| 13  | 0,005                   | 0,266          | 0,1                 | 100   | 345    | 53     | 20,427     | 0,087    |
| 14  | 0,005                   | 0,328          | 0,126               | 100   | 120    | 54     | 104,344    | 0,084    |
| 15  | 0,008                   | 0,326          | 0,131               | 100   | 506    | 54     | 110,985    | 0,094    |
| 16  | 0,002                   | 0,267          | 0,106               | 100   | 79     | 68     | 98,484     | 0,053    |
| 17  | 0,002                   | 0,187          | 0,084               | 100   | 134    | 76     | 123,871    | 0,054    |
| 18  | 0,011                   | 0,482          | 0,175               | 100   | 96     | 86     | 36,682     | 0,122    |
| 19  | 0,004                   | 0,254          | 0,099               | 100   | 325    | 80     | 118,236    | 0,075    |
| 20  | 0,01                    | 0,808          | 0,224               | 100   | 393    | 81     | 128,851    | 0,149    |
| 21  | 0,002                   | 0,185          | 0,072               | 100   | 373    | 82     | 102,612    | 0,047    |
| 22  | 0,013                   | 0,423          | 0,154               | 100   | 206    | 94     | 52,507     | 0,125    |
| 23  | 0,047                   | 0,876          | 0,305               | 100   | 689    | 95     | 166,763    | 0,244    |
| 24  | 0,005                   | 0,337          | 0,153               | 100   | 138    | 91     | 114,109    | 0,057    |
| 25  | 0,002                   | 0,187          | 0,084               | 100   | 374    | 97     | 56,129     | 0,045    |
| 26  | 0,002                   | 0,232          | 0,099               | 100   | 406    | 98     | 61,764     | 0,047    |
| 27  | 0,005                   | 0,32           | 0,141               | 100   | 432    | 97     | 131,829    | 0,078    |
| 28  | 0,003                   | 0,242          | 0,093               | 100   | 8      | 105    | 70,303     | 0,062    |
| 29  | 0,008                   | 0,488          | 0,215               | 100   | 195    | 100    | 102,612    | 0,069    |

|    |       |       |       |     |     |     |         |       |
|----|-------|-------|-------|-----|-----|-----|---------|-------|
| 30 | 0,002 | 0,185 | 0,072 | 100 | 289 | 101 | 102,612 | 0,047 |
| 31 | 0,004 | 0,298 | 0,122 | 100 | 44  | 105 | 120,823 | 0,063 |
| 32 | 0,035 | 0,834 | 0,333 | 100 | 380 | 107 | 109,191 | 0,173 |
| 33 | 0,118 | 1,846 | 0,665 | 100 | 602 | 110 | 134,84  | 0,314 |
| 34 | 0,004 | 0,267 | 0,115 | 100 | 89  | 113 | 114,109 | 0,062 |
| 35 | 0,003 | 0,219 | 0,082 | 100 | 735 | 132 | 39,963  | 0,069 |
| 36 | 0,007 | 0,398 | 0,141 | 100 | 752 | 144 | 48,171  | 0,113 |
| 37 | 0,002 | 0,197 | 0,072 | 100 | 78  | 138 | 102,612 | 0,058 |
| 38 | 0,002 | 0,162 | 0,072 | 100 | 444 | 142 | 29,19   | 0,044 |
| 39 | 0,001 | 0,162 | 0,072 | 100 | 82  | 142 | 150,81  | 0,046 |
| 40 | 0,002 | 0,277 | 0,109 | 100 | 758 | 153 | 73,388  | 0,062 |
| 41 | 0,002 | 0,22  | 0,089 | 100 | 240 | 151 | 100,148 | 0,047 |
| 42 | 0,039 | 1,159 | 0,458 | 100 | 451 | 153 | 123,06  | 0,194 |
| 43 | 0,004 | 0,3   | 0,117 | 100 | 530 | 162 | 48,171  | 0,075 |
| 44 | 0,002 | 0,242 | 0,107 | 100 | 331 | 167 | 125,603 | 0,049 |
| 45 | 0,011 | 0,507 | 0,179 | 100 | 127 | 168 | 150,81  | 0,134 |
| 46 | 0,002 | 0,269 | 0,095 | 100 | 423 | 171 | 169,451 | 0,07  |
| 47 | 0,006 | 0,451 | 0,164 | 100 | 431 | 173 | 106,612 | 0,109 |
| 48 | 0,007 | 0,37  | 0,143 | 100 | 722 | 173 | 102,612 | 0,086 |
| 49 | 0,002 | 0,197 | 0,072 | 100 | 69  | 178 | 102,612 | 0,058 |
| 50 | 0,002 | 0,228 | 0,094 | 100 | 434 | 185 | 48,171  | 0,059 |
| 51 | 0,012 | 0,46  | 0,177 | 100 | 283 | 183 | 128,065 | 0,128 |
| 52 | 0,061 | 0,956 | 0,336 | 100 | 644 | 184 | 152,11  | 0,262 |
| 53 | 0,015 | 0,517 | 0,177 | 100 | 103 | 185 | 128,065 | 0,141 |
| 54 | 0,002 | 0,181 | 0,07  | 100 | 62  | 185 | 131,829 | 0,052 |
| 55 | 0,001 | 0,164 | 0,077 | 100 | 322 | 189 | 114,109 | 0,031 |
| 56 | 0,163 | 1,713 | 0,569 | 100 | 165 | 206 | 8,821   | 0,426 |
| 57 | 0,003 | 0,244 | 0,094 | 100 | 302 | 196 | 131,829 | 0,07  |
| 58 | 0,031 | 0,722 | 0,251 | 100 | 231 | 203 | 176,005 | 0,198 |
| 59 | 0,001 | 0,164 | 0,077 | 100 | 453 | 215 | 65,891  | 0,031 |
| 60 | 0,02  | 0,683 | 0,257 | 100 | 284 | 214 | 142,277 | 0,15  |
| 61 | 0,003 | 0,207 | 0,084 | 100 | 506 | 218 | 56,129  | 0,062 |
| 62 | 0,007 | 0,48  | 0,191 | 100 | 125 | 215 | 124,842 | 0,087 |
| 63 | 0,025 | 0,794 | 0,292 | 100 | 537 | 224 | 155,294 | 0,158 |
| 64 | 0,001 | 0,15  | 0,061 | 100 | 660 | 222 | 120,823 | 0,047 |
| 65 | 0,019 | 0,73  | 0,234 | 100 | 137 | 225 | 131,829 | 0,192 |
| 66 | 0,025 | 0,698 | 0,251 | 100 | 601 | 228 | 150,81  | 0,175 |
| 67 | 0,002 | 0,24  | 0,117 | 100 | 699 | 230 | 36,682  | 0,043 |
| 68 | 0,057 | 1,041 | 0,381 | 100 | 409 | 236 | 10,549  | 0,244 |
| 69 | 0,002 | 0,197 | 0,077 | 100 | 50  | 232 | 114,109 | 0,06  |
| 70 | 0,009 | 0,448 | 0,168 | 100 | 696 | 240 | 56,129  | 0,114 |
| 71 | 0,003 | 0,254 | 0,094 | 100 | 138 | 238 | 33,838  | 0,07  |
| 72 | 0,011 | 0,583 | 0,185 | 100 | 743 | 235 | 109,697 | 0,133 |
| 73 | 0,001 | 0,129 | 0,061 | 100 | 157 | 246 | 120,823 | 0,031 |
| 74 | 0,014 | 0,505 | 0,183 | 100 | 211 | 249 | 120,823 | 0,139 |
| 75 | 0,017 | 0,515 | 0,206 | 100 | 36  | 254 | 122,067 | 0,141 |
| 76 | 0,002 | 0,207 | 0,077 | 100 | 490 | 263 | 65,891  | 0,06  |
| 77 | 0,015 | 0,554 | 0,2   | 100 | 644 | 266 | 159,573 | 0,142 |

|     |       |       |       |     |     |     |         |       |
|-----|-------|-------|-------|-----|-----|-----|---------|-------|
| 78  | 0,023 | 0,93  | 0,314 | 100 | 130 | 265 | 138,208 | 0,177 |
| 79  | 0,004 | 0,279 | 0,109 | 100 | 315 | 274 | 106,612 | 0,076 |
| 80  | 0,002 | 0,172 | 0,082 | 100 | 23  | 276 | 140,037 | 0,042 |
| 81  | 0,002 | 0,198 | 0,093 | 100 | 358 | 279 | 109,697 | 0,031 |
| 82  | 0,004 | 0,289 | 0,109 | 100 | 215 | 287 | 73,388  | 0,072 |
| 83  | 0,033 | 1,153 | 0,365 | 100 | 240 | 284 | 160,429 | 0,207 |
| 84  | 0,082 | 1,141 | 0,421 | 100 | 682 | 282 | 107,292 | 0,297 |
| 85  | 0,002 | 0,254 | 0,099 | 100 | 527 | 285 | 118,236 | 0,067 |
| 86  | 0,079 | 1,474 | 0,556 | 100 | 375 | 286 | 128,224 | 0,291 |
| 87  | 0,001 | 0,156 | 0,072 | 100 | 218 | 289 | 29,19   | 0,035 |
| 88  | 0,002 | 0,263 | 0,117 | 100 | 326 | 289 | 131,829 | 0,054 |
| 89  | 0,005 | 0,433 | 0,141 | 100 | 217 | 295 | 131,829 | 0,105 |
| 90  | 0,017 | 0,553 | 0,219 | 100 | 85  | 319 | 73,388  | 0,125 |
| 91  | 0,005 | 0,446 | 0,183 | 100 | 389 | 310 | 120,823 | 0,082 |
| 92  | 0,002 | 0,197 | 0,082 | 100 | 642 | 311 | 140,037 | 0,055 |
| 93  | 0,013 | 0,47  | 0,169 | 100 | 661 | 311 | 111,692 | 0,14  |
| 94  | 0,036 | 0,843 | 0,266 | 100 | 367 | 323 | 176,24  | 0,228 |
| 95  | 0,004 | 0,263 | 0,117 | 100 | 299 | 324 | 48,171  | 0,064 |
| 96  | 0,005 | 0,335 | 0,117 | 100 | 250 | 324 | 131,829 | 0,094 |
| 97  | 0,011 | 0,571 | 0,259 | 100 | 395 | 326 | 118,845 | 0,103 |
| 98  | 0,01  | 0,388 | 0,141 | 100 | 475 | 338 | 48,171  | 0,122 |
| 99  | 0,064 | 1,188 | 0,36  | 100 | 251 | 332 | 112,974 | 0,308 |
| 100 | 0,002 | 0,21  | 0,093 | 100 | 497 | 333 | 109,697 | 0,046 |
| 101 | 0,009 | 0,419 | 0,169 | 100 | 308 | 337 | 111,692 | 0,112 |
| 102 | 0,011 | 0,452 | 0,177 | 100 | 728 | 347 | 79,852  | 0,109 |
| 103 | 0,004 | 0,5   | 0,225 | 100 | 70  | 344 | 166,535 | 0,066 |
| 104 | 0,023 | 0,642 | 0,243 | 100 | 740 | 357 | 25,587  | 0,157 |
| 105 | 0,003 | 0,281 | 0,121 | 100 | 370 | 352 | 154,413 | 0,052 |
| 106 | 0,008 | 0,464 | 0,157 | 100 | 583 | 358 | 26,408  | 0,105 |
| 107 | 0,015 | 0,828 | 0,313 | 100 | 529 | 355 | 116,722 | 0,145 |
| 108 | 0,01  | 0,657 | 0,21  | 100 | 709 | 360 | 165,542 | 0,132 |
| 109 | 0,143 | 1,663 | 0,513 | 100 | 365 | 359 | 134,428 | 0,419 |
| 110 | 0,031 | 0,782 | 0,28  | 100 | 597 | 365 | 18,192  | 0,175 |
| 111 | 0,006 | 0,332 | 0,115 | 100 | 412 | 360 | 114,109 | 0,103 |
| 112 | 0,01  | 0,651 | 0,245 | 100 | 17  | 365 | 134,552 | 0,142 |
| 113 | 0,003 | 0,222 | 0,093 | 100 | 182 | 371 | 70,303  | 0,062 |
| 114 | 0,003 | 0,242 | 0,094 | 100 | 32  | 374 | 48,171  | 0,062 |
| 115 | 0,001 | 0,175 | 0,084 | 100 | 80  | 370 | 123,871 | 0,036 |
| 116 | 0,069 | 1,299 | 0,416 | 100 | 484 | 395 | 74,763  | 0,301 |
| 117 | 0,007 | 0,495 | 0,143 | 100 | 513 | 377 | 150,81  | 0,122 |
| 118 | 0,004 | 0,267 | 0,106 | 100 | 237 | 384 | 98,484  | 0,062 |
| 119 | 0,002 | 0,23  | 0,099 | 100 | 670 | 392 | 61,764  | 0,047 |
| 120 | 0,002 | 0,156 | 0,072 | 100 | 239 | 390 | 150,81  | 0,035 |
| 121 | 0,002 | 0,198 | 0,093 | 100 | 456 | 395 | 109,697 | 0,031 |
| 122 | 0,005 | 0,347 | 0,152 | 100 | 79  | 399 | 145,072 | 0,078 |
| 123 | 0,031 | 0,667 | 0,229 | 100 | 44  | 400 | 97,84   | 0,203 |
| 124 | 0,006 | 0,344 | 0,126 | 100 | 360 | 402 | 172,049 | 0,091 |
| 125 | 0,008 | 0,415 | 0,164 | 100 | 590 | 401 | 106,612 | 0,088 |

|          |       |       |       |     |        |        |         |       |
|----------|-------|-------|-------|-----|--------|--------|---------|-------|
| 126      | 0,004 | 0,289 | 0,131 | 100 | 679    | 404    | 126,717 | 0,064 |
| 127      | 0,005 | 0,326 | 0,131 | 100 | 488    | 406    | 110,985 | 0,078 |
| 128      | 0,012 | 0,423 | 0,164 | 100 | 326    | 420    | 48,171  | 0,125 |
| 129      | 0,004 | 0,279 | 0,109 | 100 | 432    | 419    | 106,612 | 0,078 |
| 130      | 0,021 | 0,566 | 0,195 | 100 | 474    | 421    | 99,243  | 0,171 |
| 131      | 0,002 | 0,232 | 0,107 | 100 | 212    | 436    | 54,397  | 0,049 |
| 132      | 0,001 | 0,156 | 0,072 | 100 | 315    | 433    | 150,81  | 0,035 |
| 133      | 0,017 | 0,595 | 0,215 | 100 | 645    | 444    | 29,19   | 0,15  |
| 134      | 0,019 | 0,57  | 0,212 | 100 | 110    | 451    | 81,516  | 0,162 |
| 135      | 0,002 | 0,209 | 0,105 | 100 | 678    | 456    | 138,208 | 0,035 |
| 136      | 0,013 | 0,501 | 0,175 | 100 | 177    | 462    | 116,438 | 0,143 |
| 137      | 0,031 | 0,884 | 0,3   | 100 | 451    | 466    | 159,573 | 0,192 |
| 138      | 0,005 | 0,332 | 0,121 | 100 | 281    | 474    | 154,413 | 0,07  |
| 139      | 0,035 | 0,834 | 0,295 | 100 | 535    | 495    | 71,447  | 0,219 |
| 140      | 0,003 | 0,185 | 0,084 | 100 | 105    | 484    | 123,871 | 0,047 |
| 141      | 0,001 | 0,164 | 0,077 | 100 | 327    | 497    | 65,891  | 0,031 |
| 142      | 0,016 | 0,623 | 0,222 | 100 | 561    | 494    | 134,84  | 0,145 |
| 143      | 0,069 | 1,061 | 0,38  | 100 | 740    | 502    | 161,219 | 0,274 |
| 144      | 0,008 | 0,422 | 0,188 | 100 | 635    | 503    | 146,162 | 0,09  |
| 145      | 0,002 | 0,277 | 0,115 | 100 | 679    | 503    | 114,109 | 0,059 |
| 146      | 0,009 | 0,363 | 0,151 | 100 | 254    | 507    | 136,238 | 0,097 |
| 147      | 0,008 | 0,579 | 0,219 | 100 | 234    | 521    | 73,388  | 0,102 |
| 148      | 0,049 | 0,909 | 0,324 | 100 | 504    | 517    | 103,961 | 0,256 |
| 149      | 0,002 | 0,185 | 0,072 | 100 | 327    | 526    | 102,612 | 0,047 |
| 150      | 0,002 | 0,219 | 0,082 | 100 | 75     | 539    | 39,963  | 0,061 |
| 151      | 0,001 | 0,164 | 0,077 | 100 | 499    | 539    | 65,891  | 0,031 |
| 152      | 0,008 | 0,546 | 0,207 | 100 | 503    | 539    | 112,137 | 0,107 |
| 153      | 0,001 | 0,164 | 0,077 | 100 | 194    | 540    | 114,109 | 0,031 |
| 154      | 0,001 | 0,164 | 0,077 | 100 | 295    | 547    | 65,891  | 0,031 |
| 155      | 0,002 | 0,256 | 0,126 | 100 | 267    | 544    | 172,049 | 0,017 |
| 156      | 0,019 | 0,515 | 0,191 | 100 | 468    | 561    | 124,842 | 0,137 |
| 157      | 0,005 | 0,323 | 0,137 | 100 | 333    | 568    | 62,913  | 0,062 |
| 158      | 0,003 | 0,228 | 0,086 | 100 | 356    | 568    | 155,919 | 0,07  |
| Average= | 0,015 | 0,462 | 0,172 | 100 | 359,59 | 273,68 | 105,012 | 0,110 |
